# Supplementary material for: A novel scaffold for EGFR inhibition: Introducing N-(3-(3-phenylureido)quinoxalin-6-yl) acrylamide derivatives
Source: PubMed Central journal article supplement (PMC6327040; doi:10.1038/s41598-018-36846-7), 2019-01-09
Supplement: 41598_2018_36846_MOESM1_ESM.pdf [file 41598_2018_36846_MOESM1_ESM.pdf]

## Supplementary Material

**Manuscript Title:** “A novel scaffold for EGFR inhibition: Introducing N-(3-(3-phenylureido)quinoxalin-6-yl) acrylamide derivatives.”

**Authors:** Daniel Nascimento do Amaral, Jonas Lategahn, Harold Hilarion Fokoue, Eduardo Miguez Bastos da Silva, Carlos Mauricio R. Sant’Anna, Daniel Rauh, Eliezer J. Barreiro, Stefan Laufer\*, Lídia Moreira Lima \*

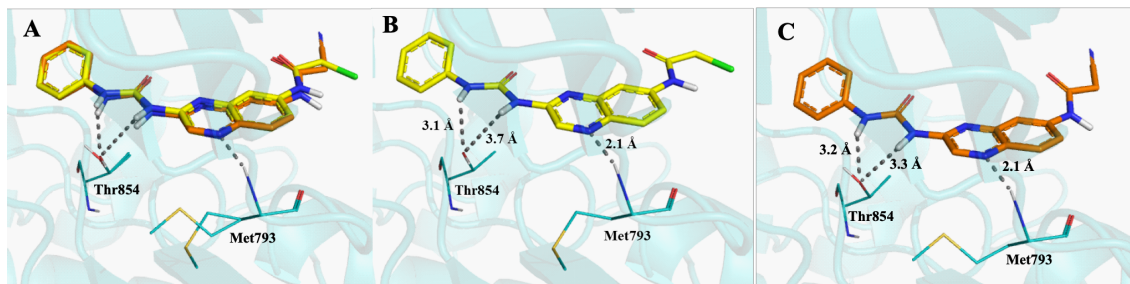

**Figure S1:** Simple docking best poses for compounds **7j** and **7k**, with electrophilic carbon of the  $\alpha$ -carbon of carbonyl subunit, in the ATP binding site of EGFRwt. (A) Superposition of **7j** and **7k**; (B) Interaction profile of compound **7j** (carbon atoms in yellow); (C) Interaction profile of compound **7i** (carbon atoms in orange). Dashed gray lines: Hydrogen bonds.

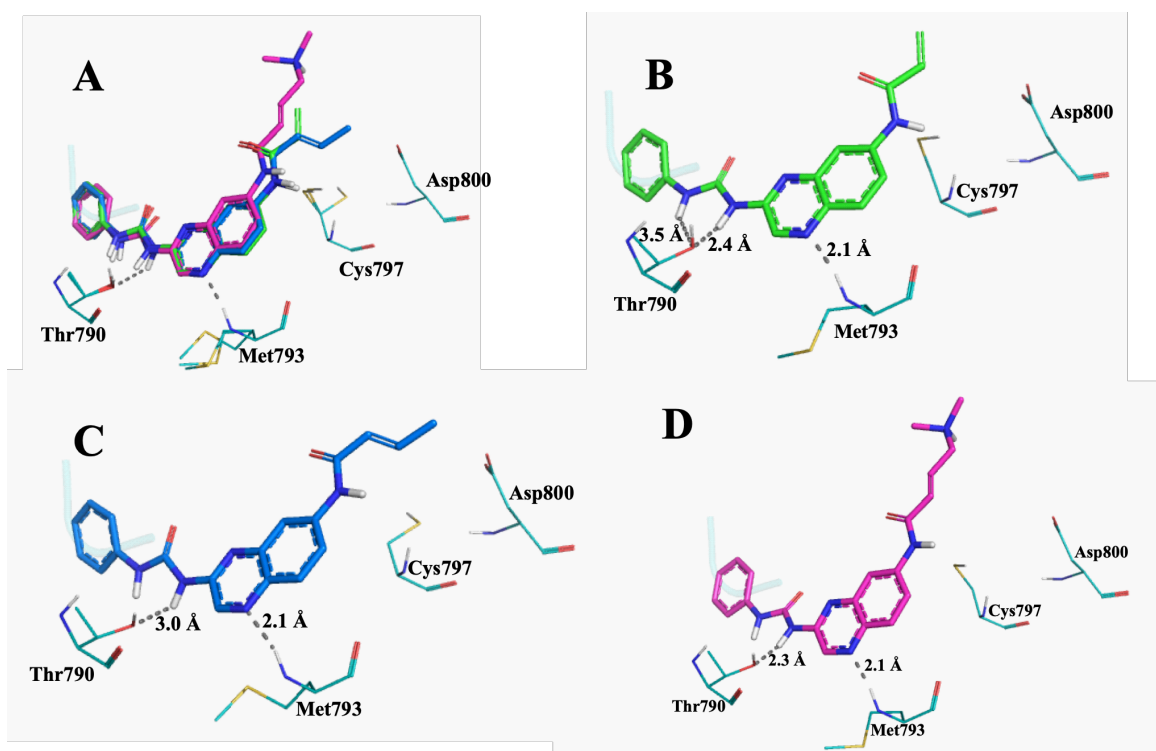

**Figure S2:** Simple docking best poses for compounds **7h**, **7i** and **7l**, with electrophilic carbon of the enone subunit, in the ATP binding site of EGFRwt. (A) Superposition of **7h**, **7i** and **7l**; (B) Interaction profile of compound **7h** (carbon atoms in green); (C) Interaction profile of compound **7i** (carbon atoms in blue); (D) Interaction profile of compound **7l** (carbon atoms in magenta). Dashed gray lines: Hydrogen bonds.

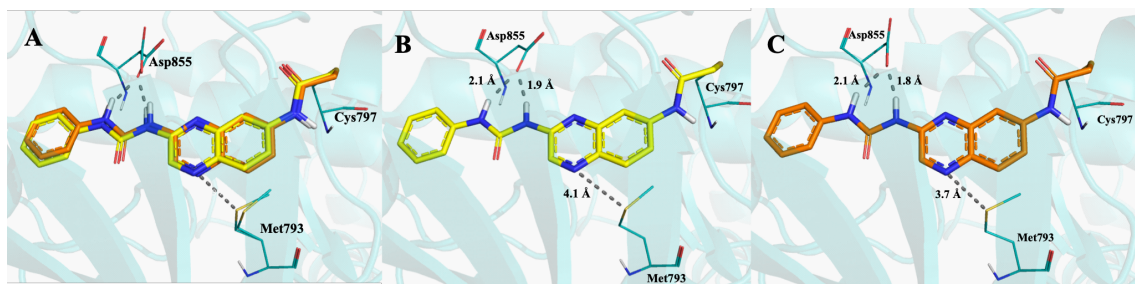

**Figure S3:** Covalent docking best poses for compounds **7j** and **7k**, with electrophilic carbon of the  $\alpha$ -carbon of carbonyl subunit, in the ATP binding site of EGFR<sub>wt</sub>. (A) Superposition of **7j** and **7k**; (B) Interaction profile of compound **7j** (carbon atoms in yellow); (C) Interaction profile of compound **7k** (carbon atoms in orange). Dashed gray lines: Hydrogen bonds.

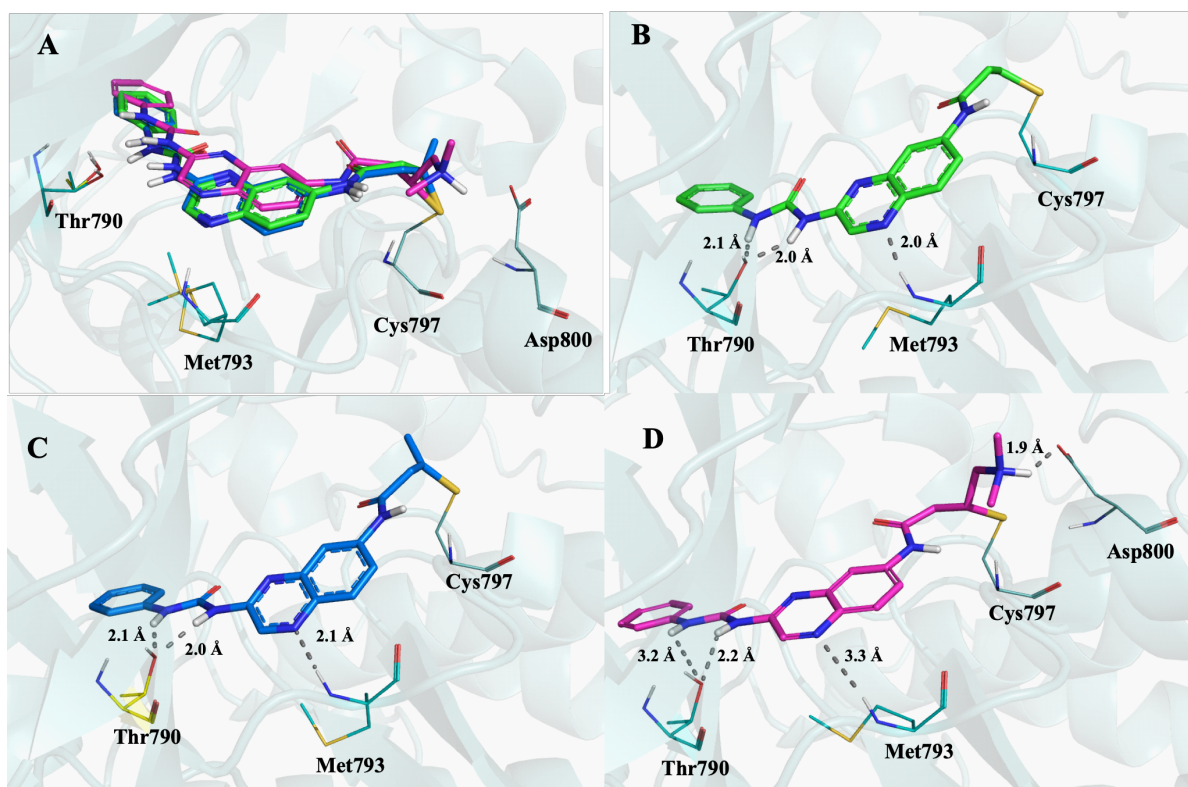

**Figure S4:** Covalent docking best poses for compounds **7h**, **7i** and **7l**, with electrophilic carbon of the enone subunit, in the ATP binding site of EGFR<sub>wt</sub>. (A) Superposition of **7h**, **7i** and **7l**; (B) Interaction profile of compound **7h** (carbon atoms in green); (C) Interaction profile of compound **7i** (carbon atoms in blue); (D) Interaction profile of compound **7l** (carbon atoms in magenta). Dashed gray lines: Hydrogen bonds.

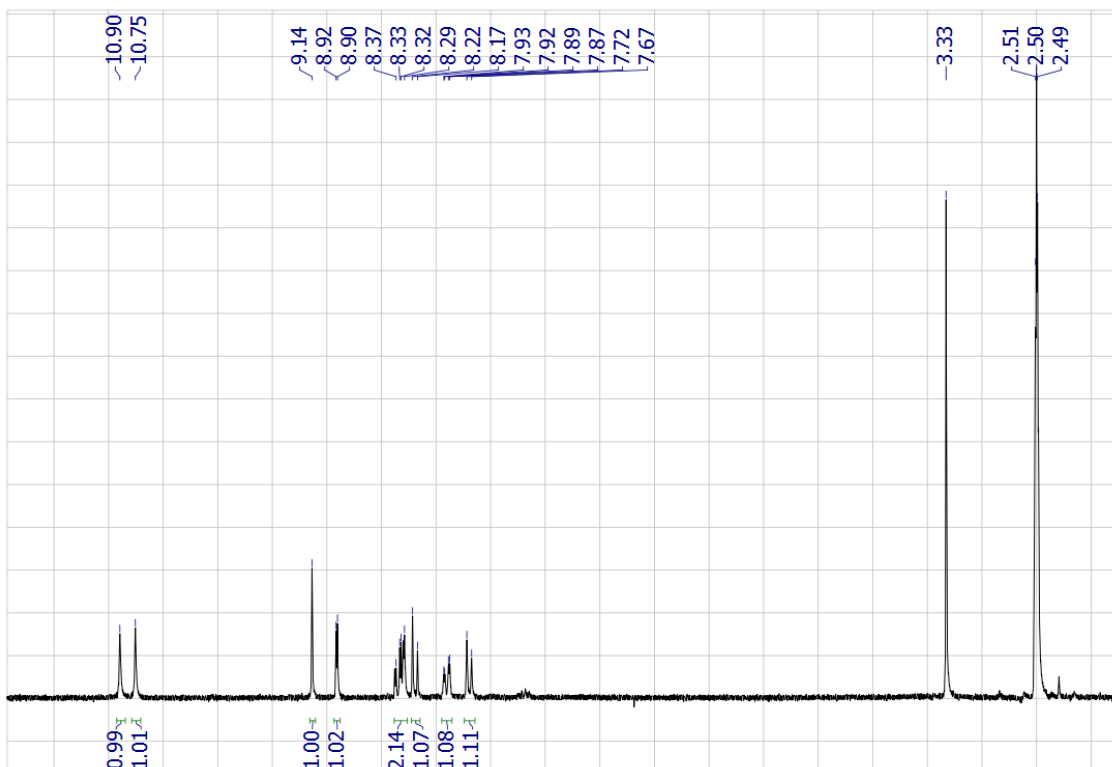

**Figure S5.**  $^1\text{H}$  NMR spectrum of compound 1-(7-nitroquinoxalin-2-yl)-3-(4-chloro-3-(trifluoromethyl)phenyl)urea (**9a**) (DMSO- $d_6$ /200MHz/TMS).

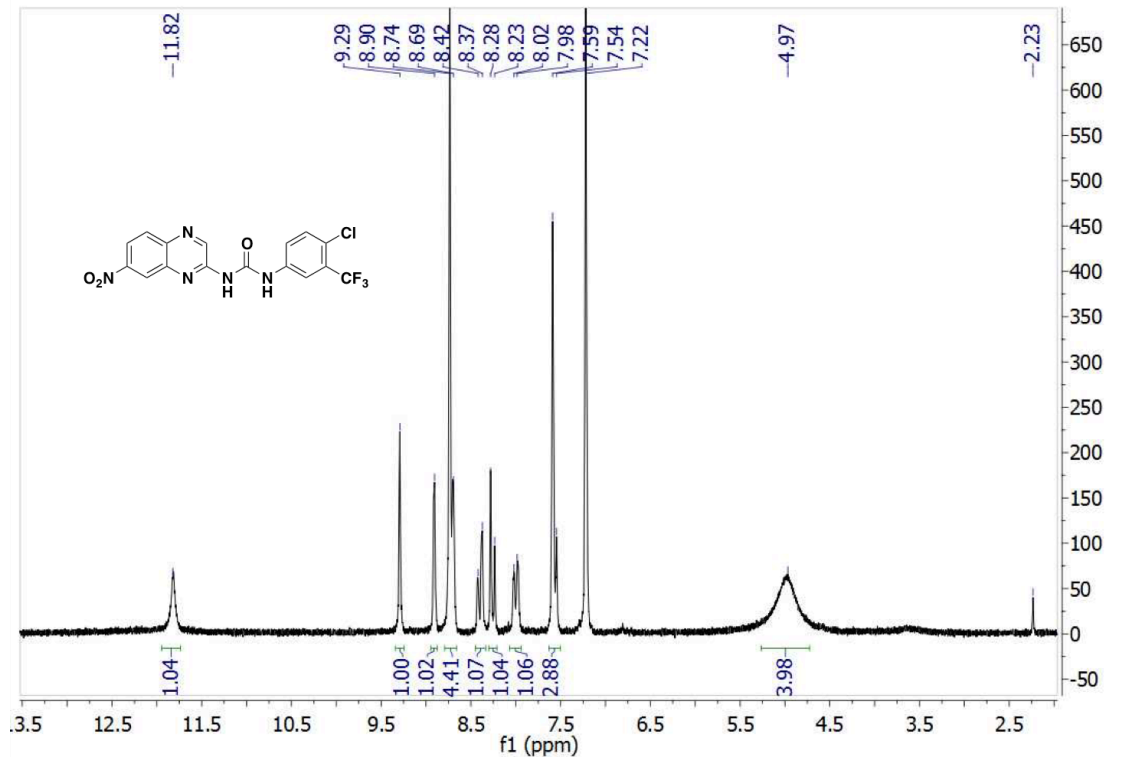

**Figure S6.**  $^1\text{H}$  NMR spectrum of compound 1-(7-nitroquinoxalin-2-yl)-3-(4-chloro-3-(trifluoromethyl)phenyl)urea (**9a**) (pyridine- $d_5$ /200MHz/TMS)

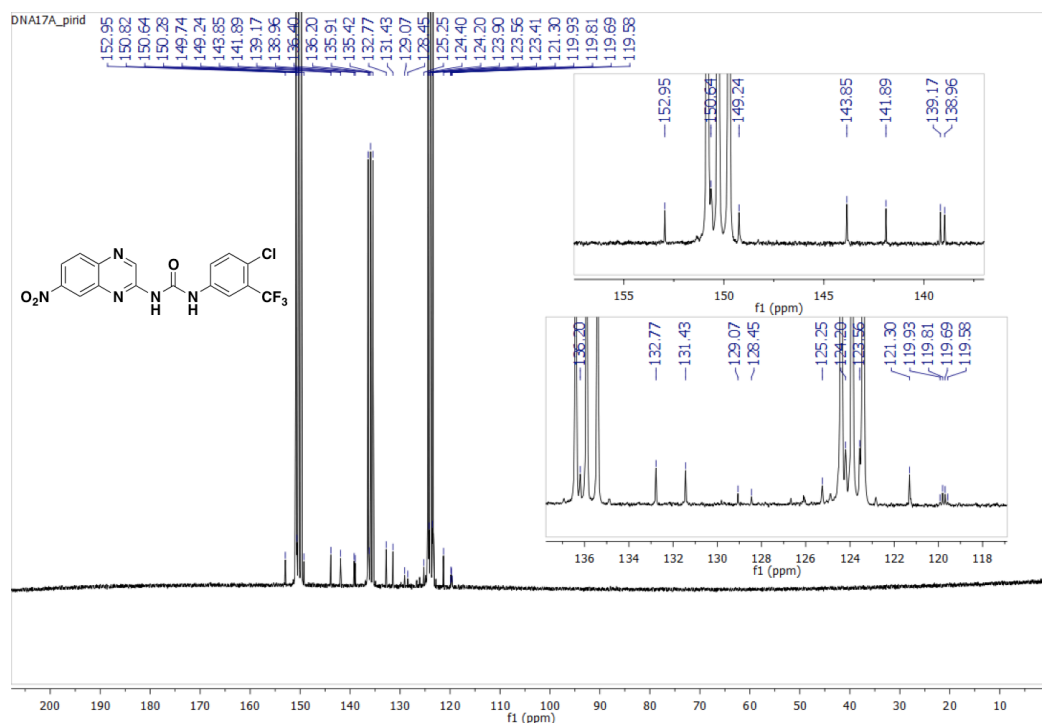

**Figure S7.** <sup>13</sup>C NMR spectrum of compound 1-(7-nitroquinoxalin-2-yl)-3-(4-chloro-3-(trifluoromethyl)phenyl)urea (**9a**) (pyridine-d<sub>5</sub>/200MHz/TMS)

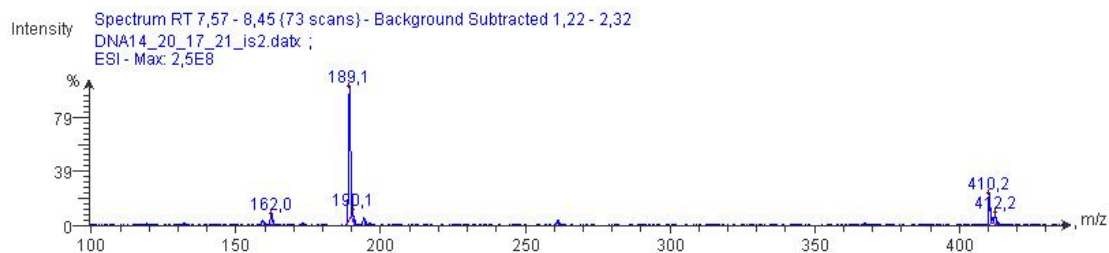

**Figure S8.** Mass spectrometry of compound 1-(7-nitroquinoxalin-2-yl)-3-(4-chloro-3-(trifluoromethyl)phenyl)urea (**9a**) in negative mode (ESI-).

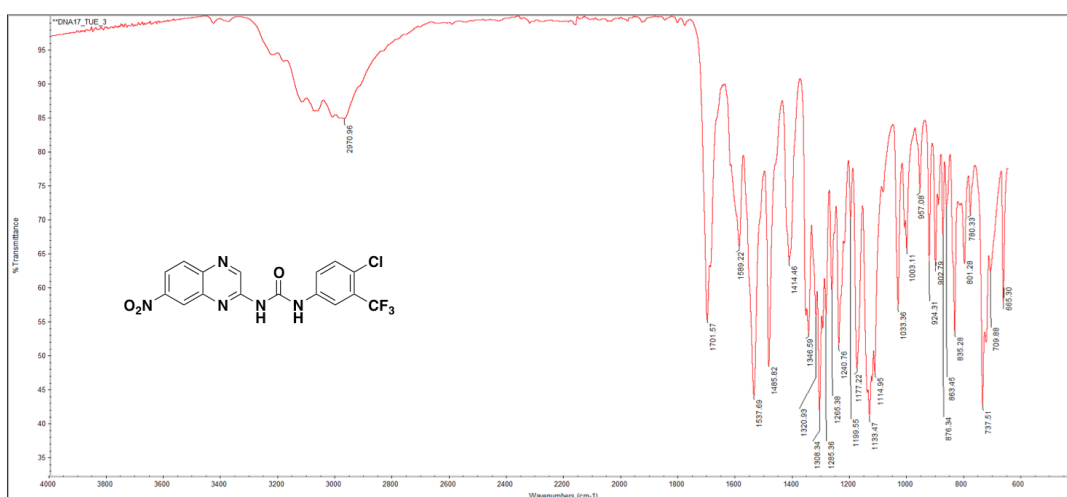

**Figure S9.** Infra red spectrum (ATR-FTIR) of compound 1-(7-nitroquinoxalin-2-yl)-3-(4-chloro-3-(trifluoromethyl)phenyl)urea (**9a**) (bands in cm<sup>-1</sup>).



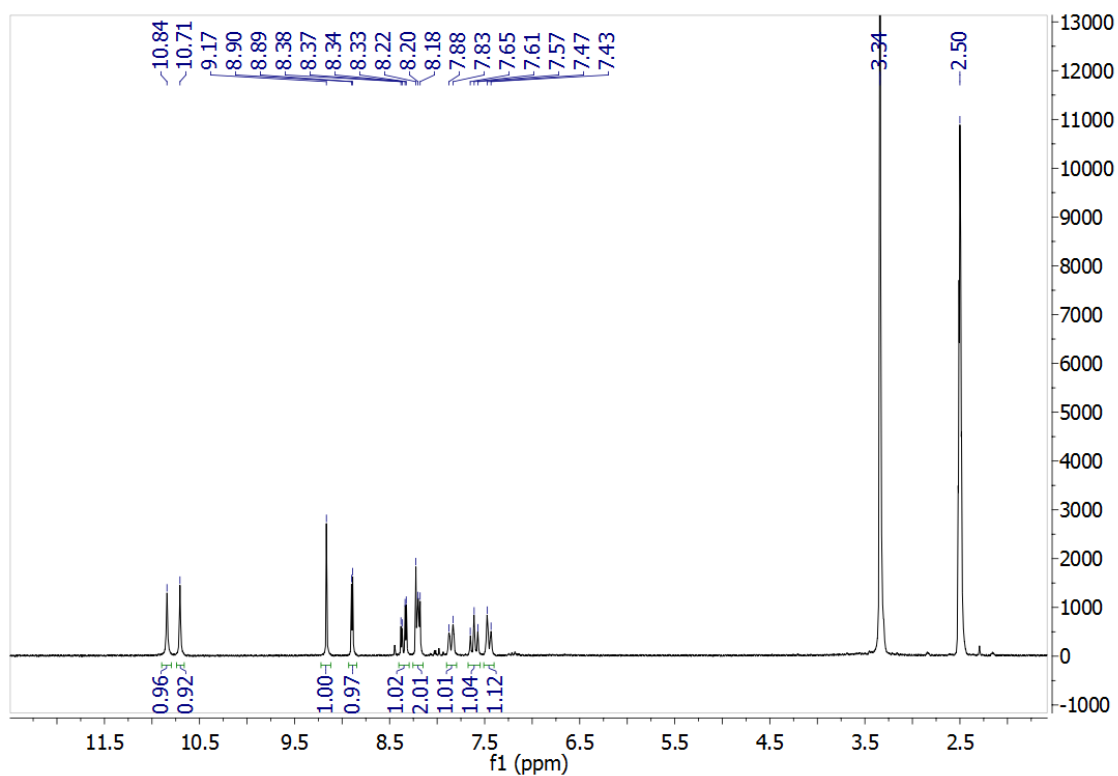

**Figure S10.**  $^1\text{H}$  NMR spectrum of compound 1-(7-nitroquinoxalin-2-yl)-3-(3-(trifluoromethyl)phenyl)urea (**9b**) (DMSO- $d_6$ /200MHz/TMS)

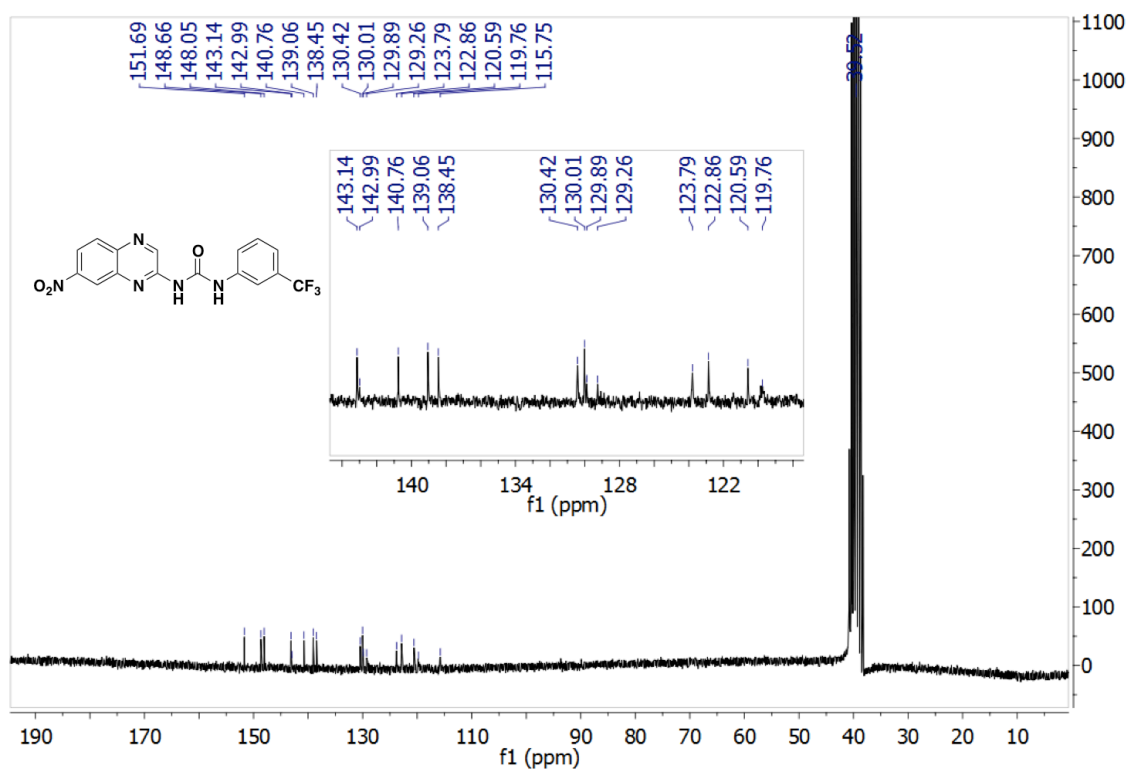

**Figure S11.**  $^{13}\text{C}$  NMR spectrum of compound 1-(7-nitroquinoxalin-2-yl)-3-(3-(trifluoromethyl)phenyl)urea (**9b**) (DMSO- $d_6$ /50MHz/TMS)

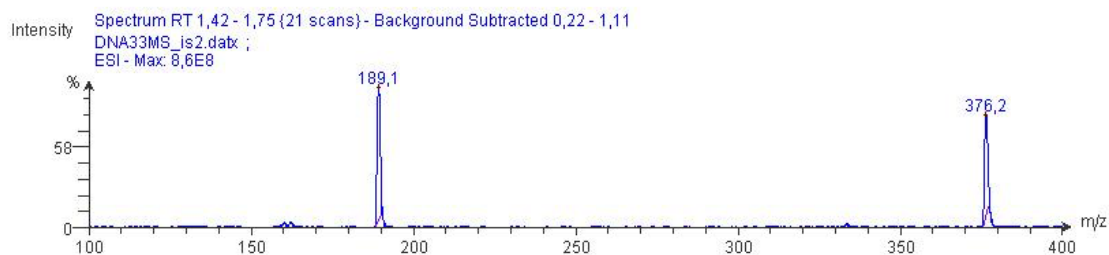

**Figure S12.** Mass spectrometry of compound 1-(7-nitroquinoxalin-2-yl)-3-(3-(trifluormethyl)phenyl) urea (**9b**) in negative mode (ESI-).

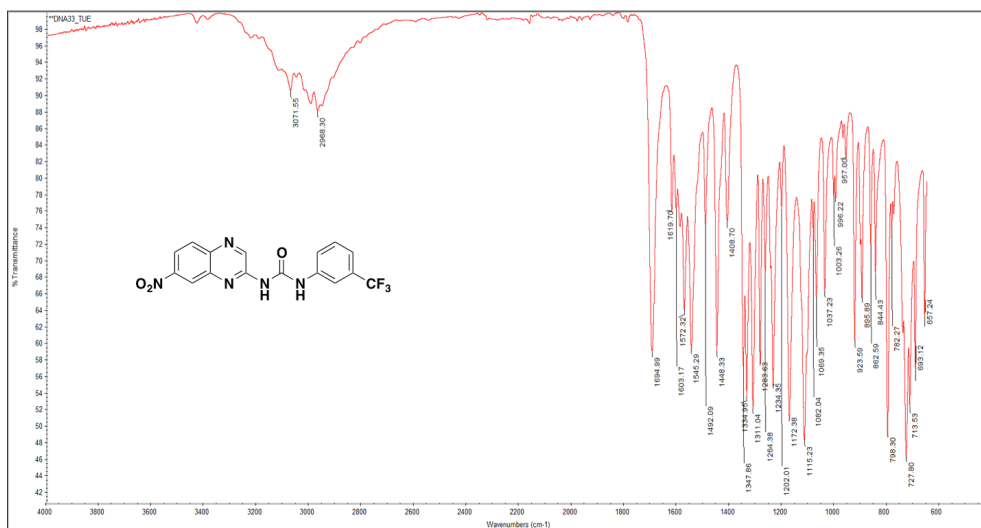

**Figure S13.** Infra red spectrum (ATR-FTIR) of compound 1-(7-nitroquinoxalin-2-yl)-3-(3-(trifluormethyl) phenyl) urea (**9b**) (bands in cm<sup>-1</sup>).

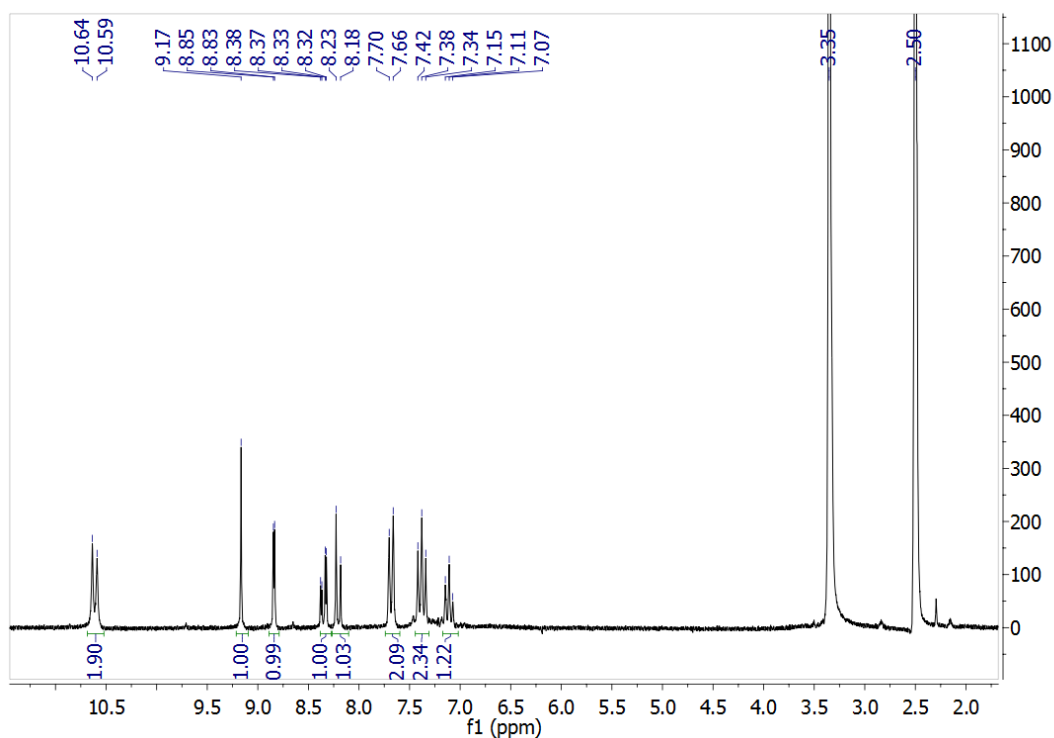

**Figure S14.** <sup>1</sup>H NMR spectrum of compound 1-(7-nitroquinoxalin-2-yl)-3-phenylurea (**9c**) (DMSO-d<sub>6</sub>/200MHz/TMS)

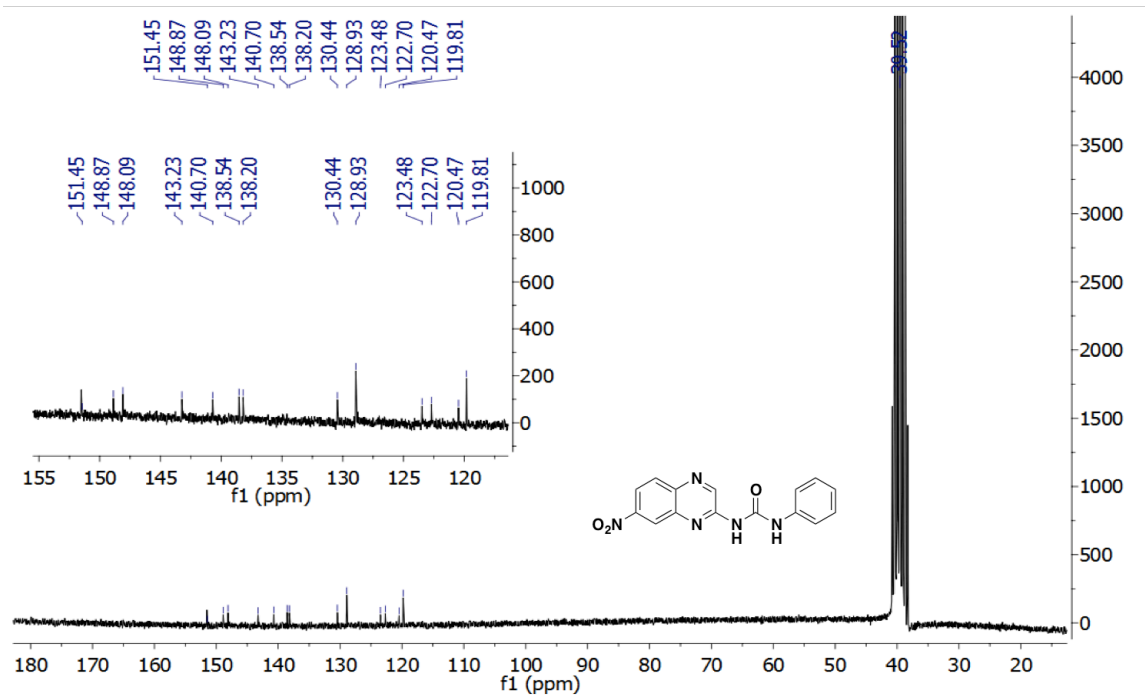

**Figure S15.**  $^{13}\text{C}$  NMR spectrum of compound 1-(7-nitroquinoxalin-2-yl)-3-phenylurea (**9c**) (DMSO- $d_6$ /50MHz/TMS)

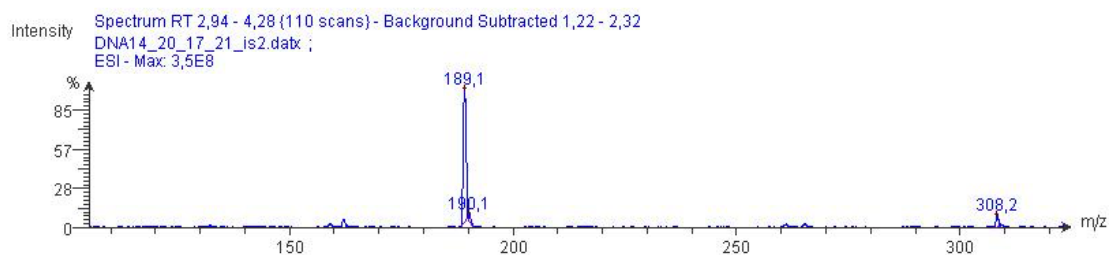

**Figure S16.** Mass spectrometry of compound 1-(7-nitroquinoxalin-2-yl)-3-phenylurea (**9c**) in negative mode (ESI-).

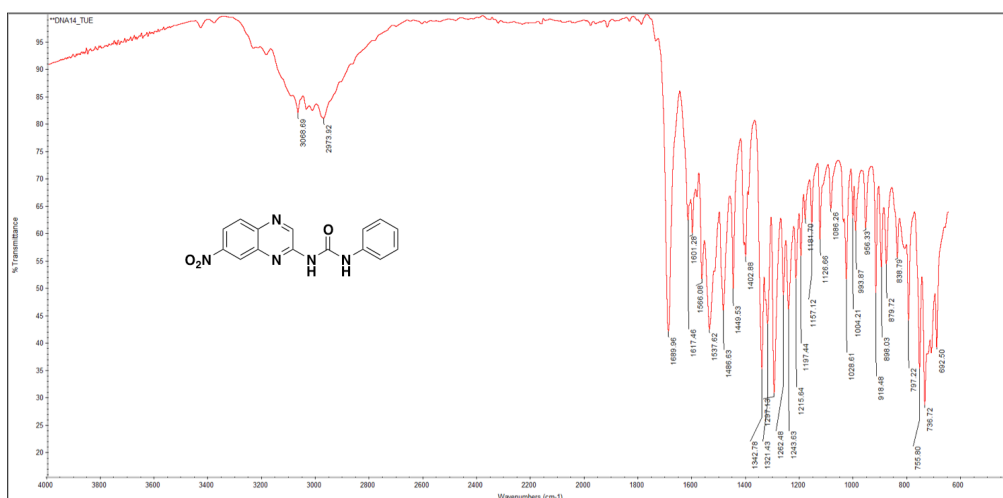

**Figure S17.** Infra red spectrum (ATR-FTIR) of compound 1-(7-nitroquinoxalin-2-yl)-3-phenylurea (**9c**) (bands in  $\text{cm}^{-1}$ ).

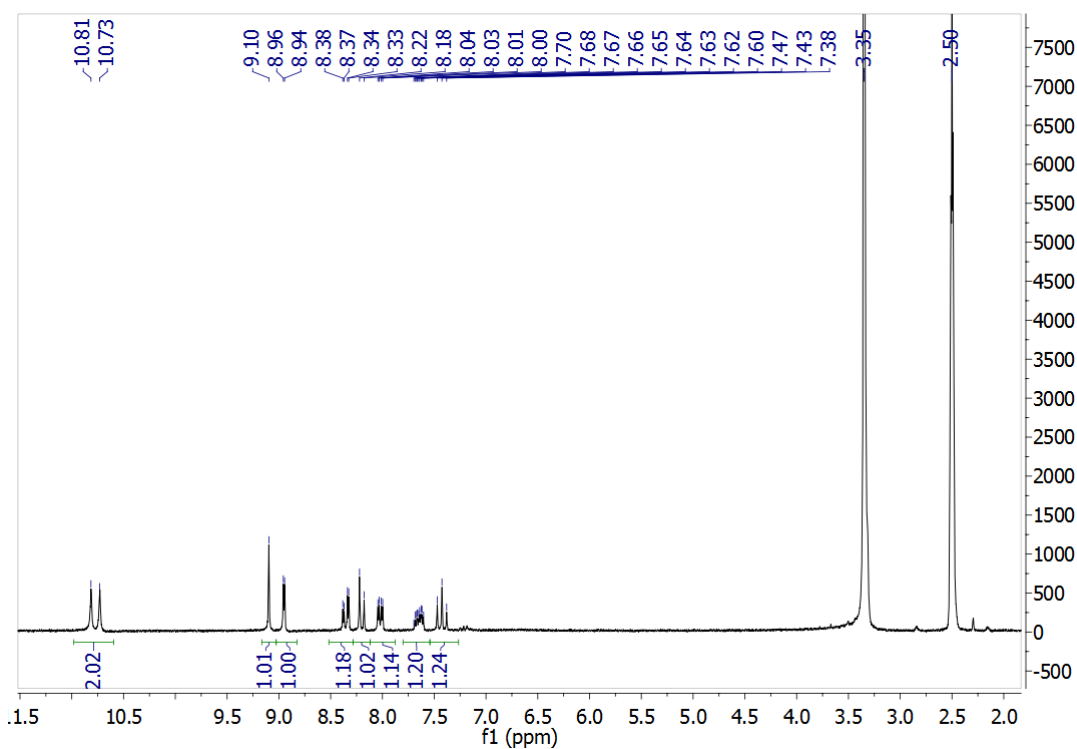

**Figure S18.**  $^1\text{H}$  NMR spectrum of compound 1-(3-chloro-4-fluorophenyl)-3-(7-nitroquinoxalin-2-yl)urea (**9d**) (DMSO- $d_6$ /200MHz/TMS)

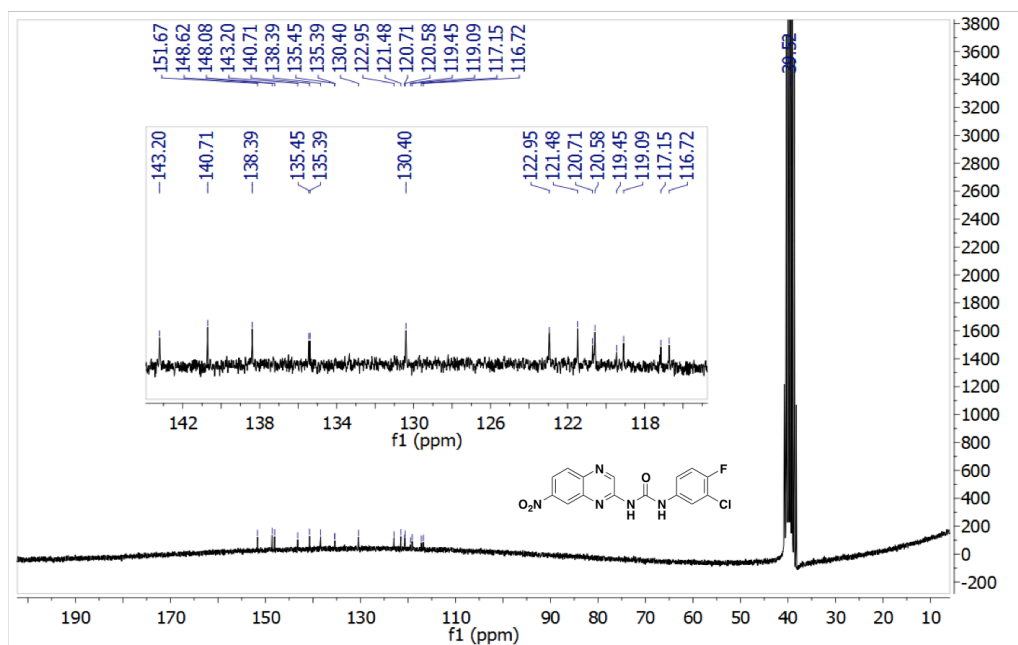

**Figure S19.**  $^{13}\text{C}$  NMR spectrum of compound 1-(3-chloro-4-fluorophenyl)-3-(7-nitroquinoxalin-2-yl)urea (**9d**) (DMSO- $d_6$ /50MHz/TMS)

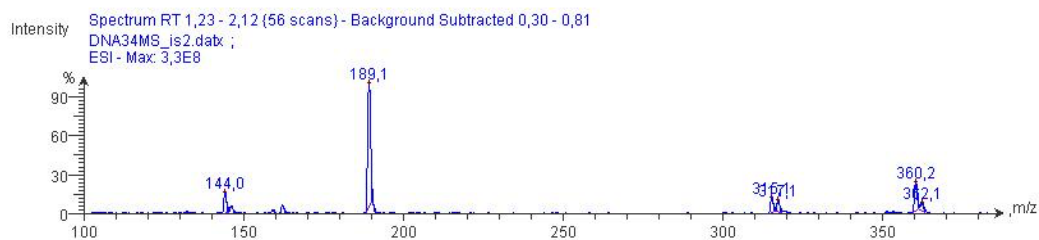

**Figure S20.** Mass spectrometry of compound 1-(3-chloro-4-fluorophenyl)-3-(7-nitroquinoxalin-2-yl)urea (**9d**) in negative mode (ESI-).

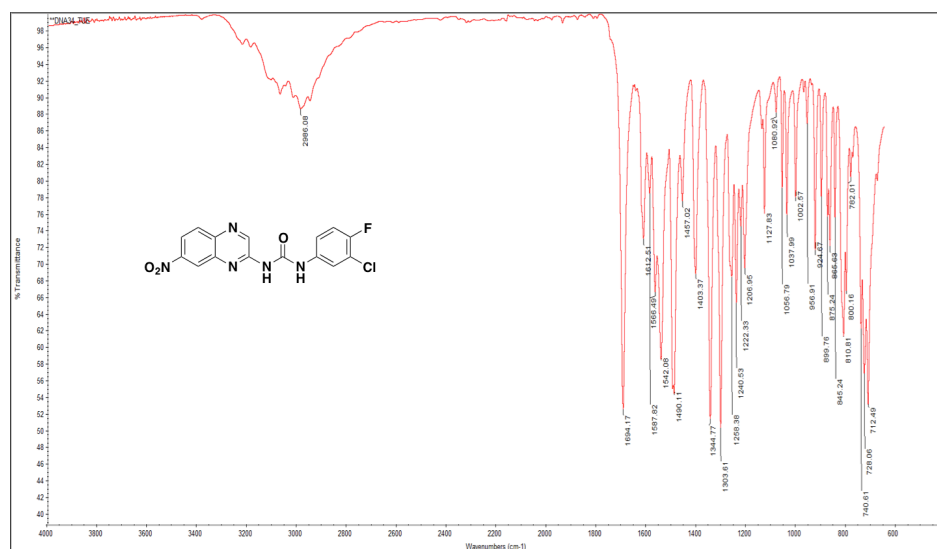

**Figure S21.** Infra red spectrum (ATR-FTIR) of compound 1-(3-chloro-4-fluorophenyl)-3-(7-nitroquinoxalin-2-yl)urea (**9d**) (bands in cm<sup>-1</sup>).

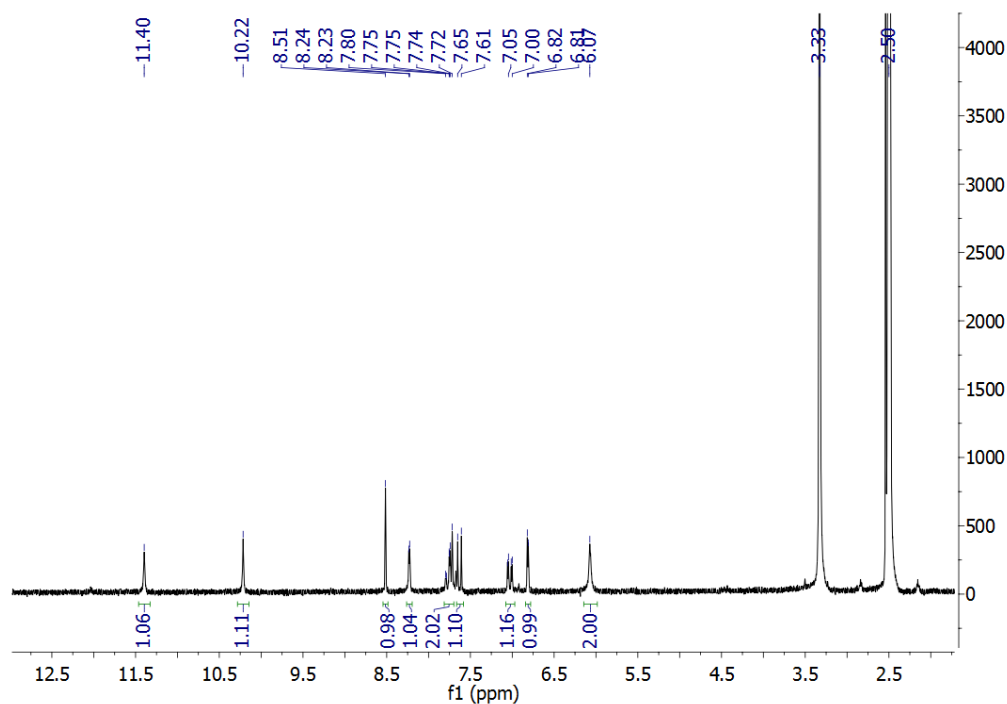

**Figure S22.** <sup>1</sup>H NMR spectrum of 1-(7-aminoquinoxalin-2-yl)-3-(4-chloro-3-(trifluoromethyl)phenyl)urea (**10a**) (DMSO-d<sub>6</sub>/200MHz/TMS)



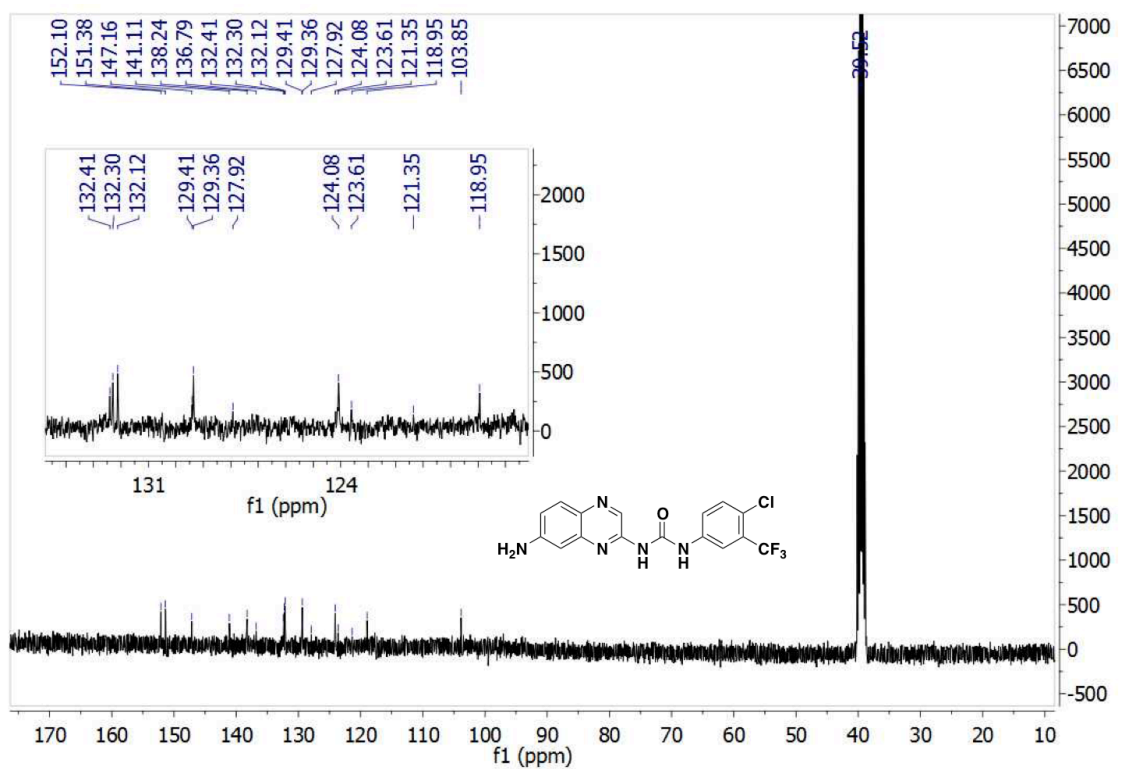

**Figure S23.**  $^{13}\text{C}$  NMR spectrum of compound 1-(7-aminoquinoxalin-2-yl)-3-(4-chloro-3-(trifluoromethyl) phenyl)urea (**10a**) (DMSO- $d_6$ /100MHz/TMS)

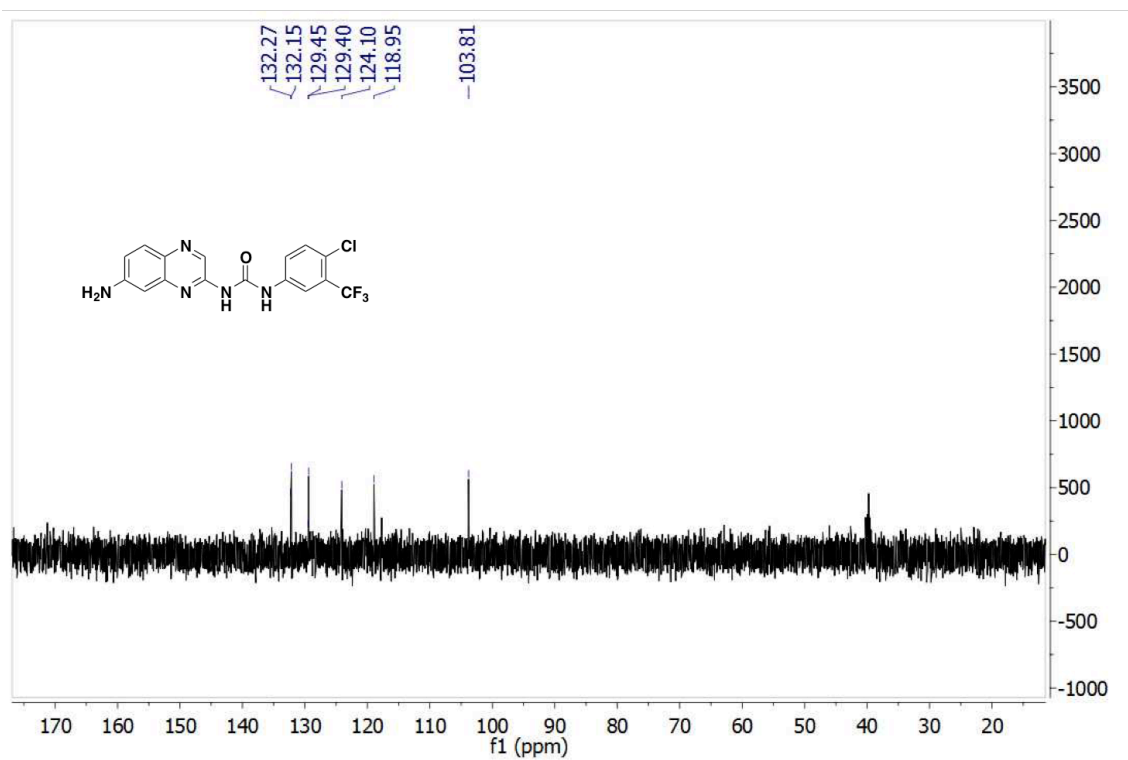

**Figure S24.** Espectro de DEPT 135 of compound 1-(7-aminoquinoxalin-2-yl)-3-(4-chloro-3-(trifluoromethyl) phenyl)urea (**10a**) (DMSO- $d_6$ /100MHz/TMS)

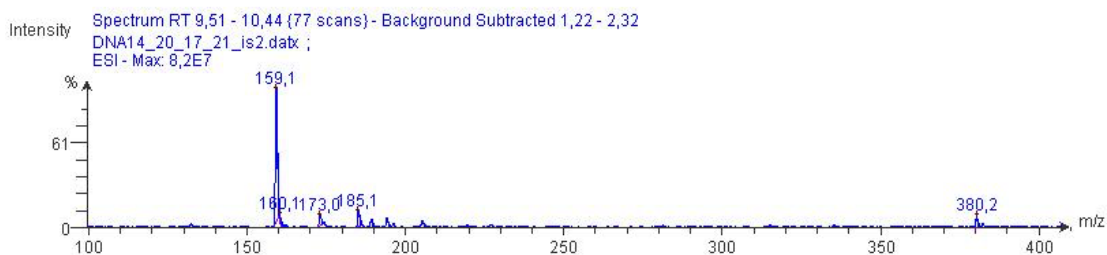

**Figure S25.** Mass spectrometry of compound 1-(7-aminoquinoxalin-2-yl)-3-(4-chloro-3-(trifluoromethyl) phenyl) urea (**10a**) in negative mode (ESI-).

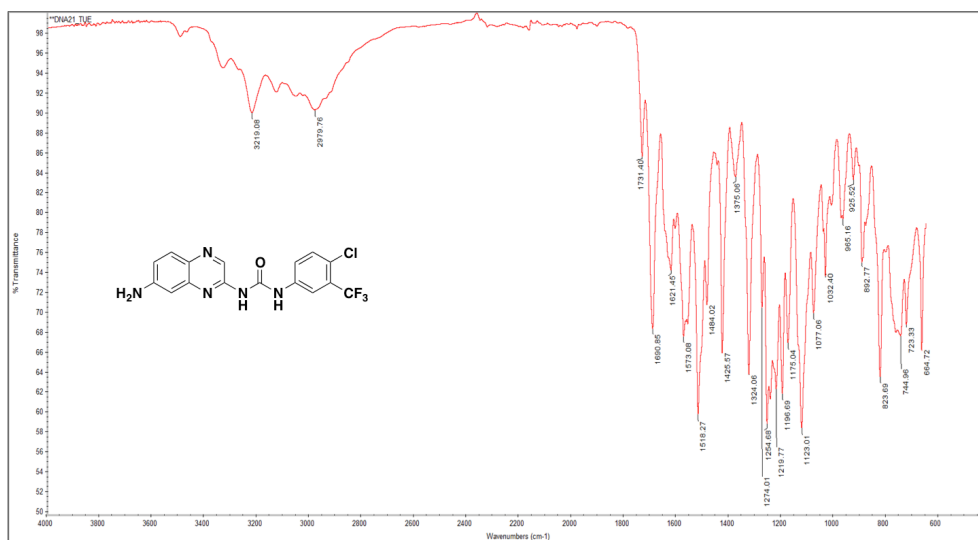

**Figure S26.** Infra red spectrum (ATR-FTIR) of compound 1-(7-aminoquinoxalin-2-yl)-3-(4-chloro-3-(trifluoromethyl) phenyl) urea (**10a**) (bands in cm<sup>-1</sup>).

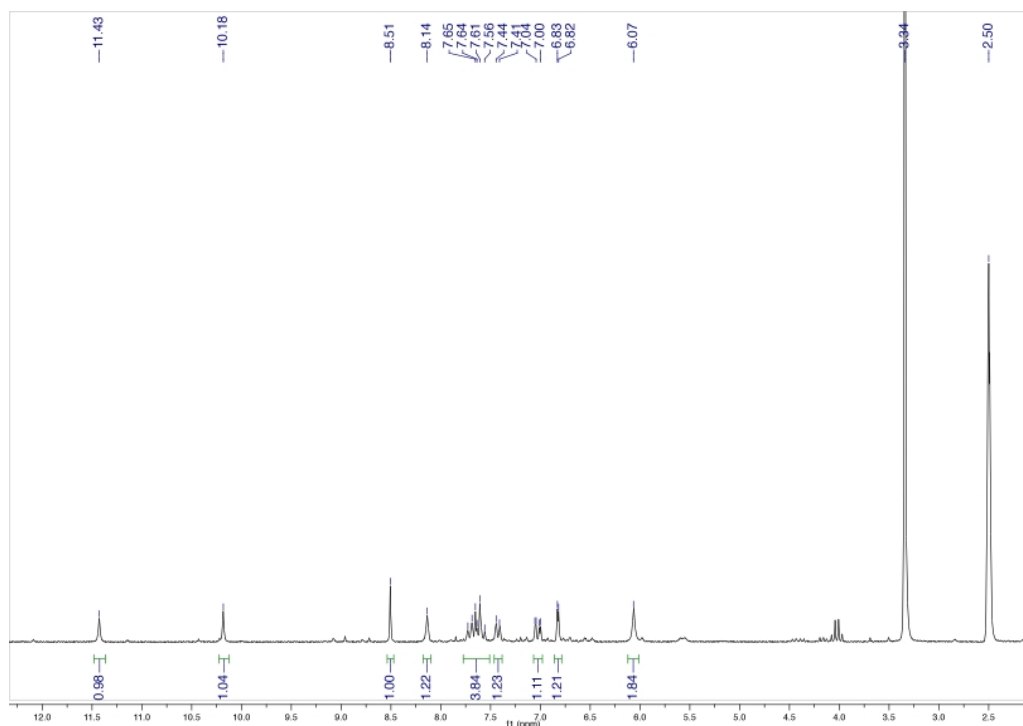

**Figure S27.** <sup>1</sup>H NMR spectrum of compound 1-(7-aminoquinoxalin-2-yl)-3-(3-(trifluoromethyl)phenyl) urea (**10b**) (DMSO-d<sub>6</sub>/200MHz/TMS)

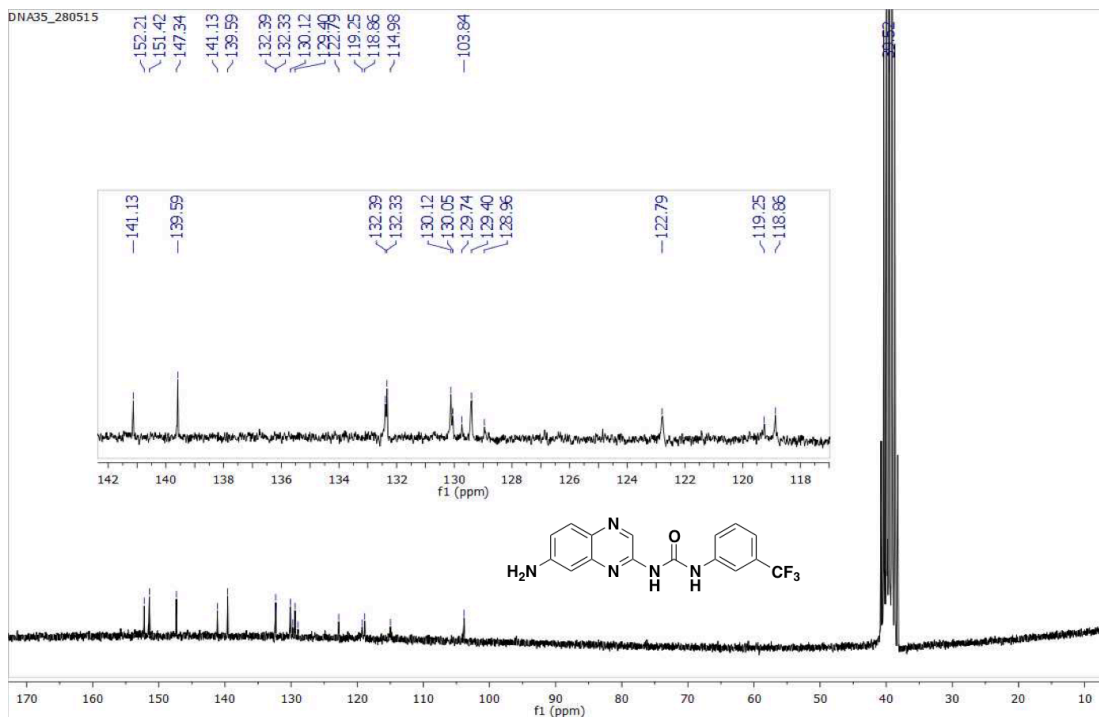

**Figure S28.** <sup>13</sup>C NMR spectrum of compound 1-(7-aminoquinoxalin-2-yl)-3-(3-(trifluoromethyl)phenyl) urea (**10b**) (DMSO-d<sub>6</sub>/50MHz/TMS)

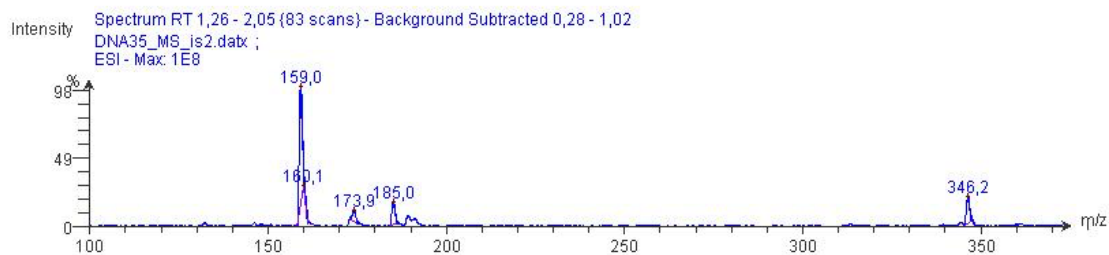

**Figure S29.** Mass spectrometry of compound 1-(7-aminoquinoxalin-2-yl)-3-(3-(trifluoromethyl)phenyl) urea (**10b**) in negative mode (ESI-).

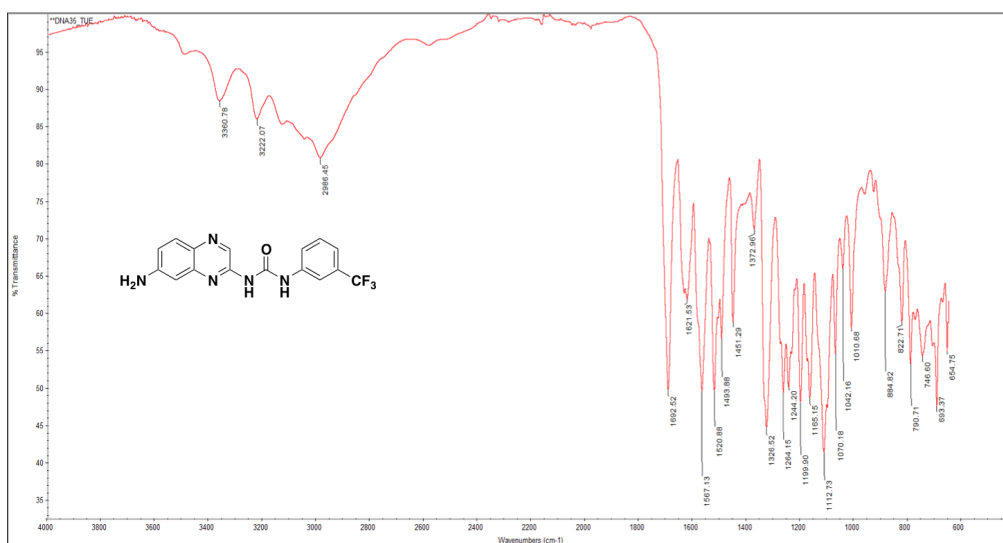

**Figure S30.** Infra red spectrum (ATR-FTIR) of compound 1-(7-aminoquinoxalin-2-yl)-3-(3-(trifluoromethyl)phenyl) urea (**10b**) (bands in cm<sup>-1</sup>).

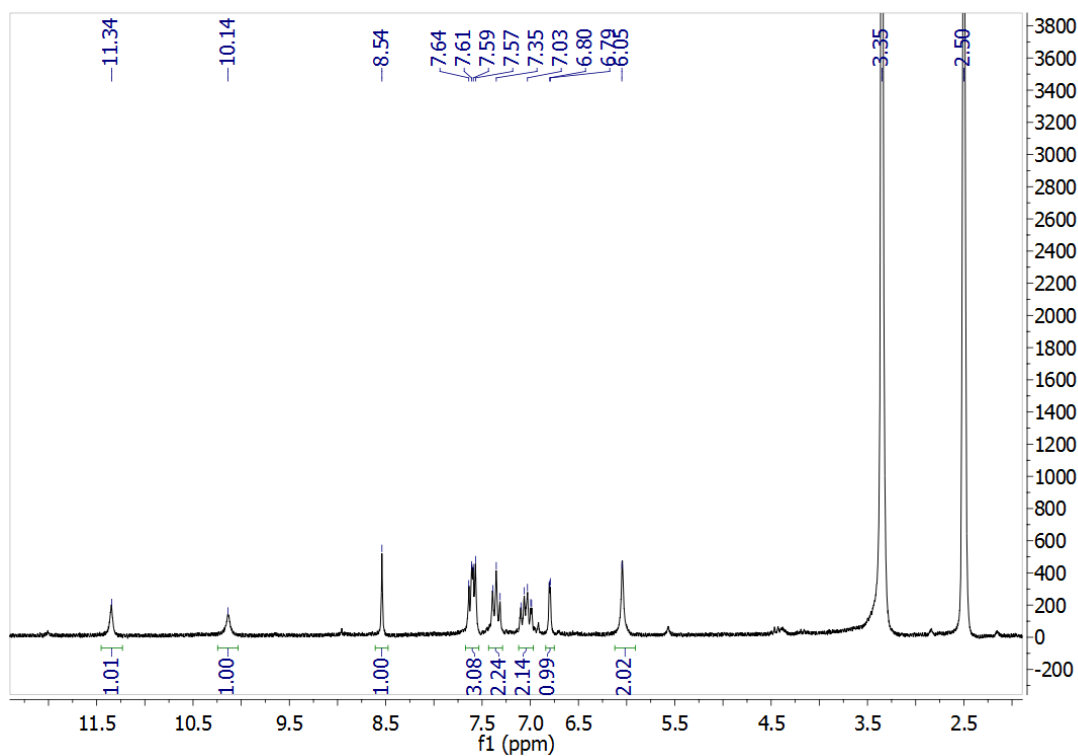

**Figure S31.**  $^1\text{H}$  NMR spectrum of compound 1-(7-aminoquinoxalin-2-yl)-3-phenylurea (**10c**) (DMSO- $d_6$ /200MHz/TMS)

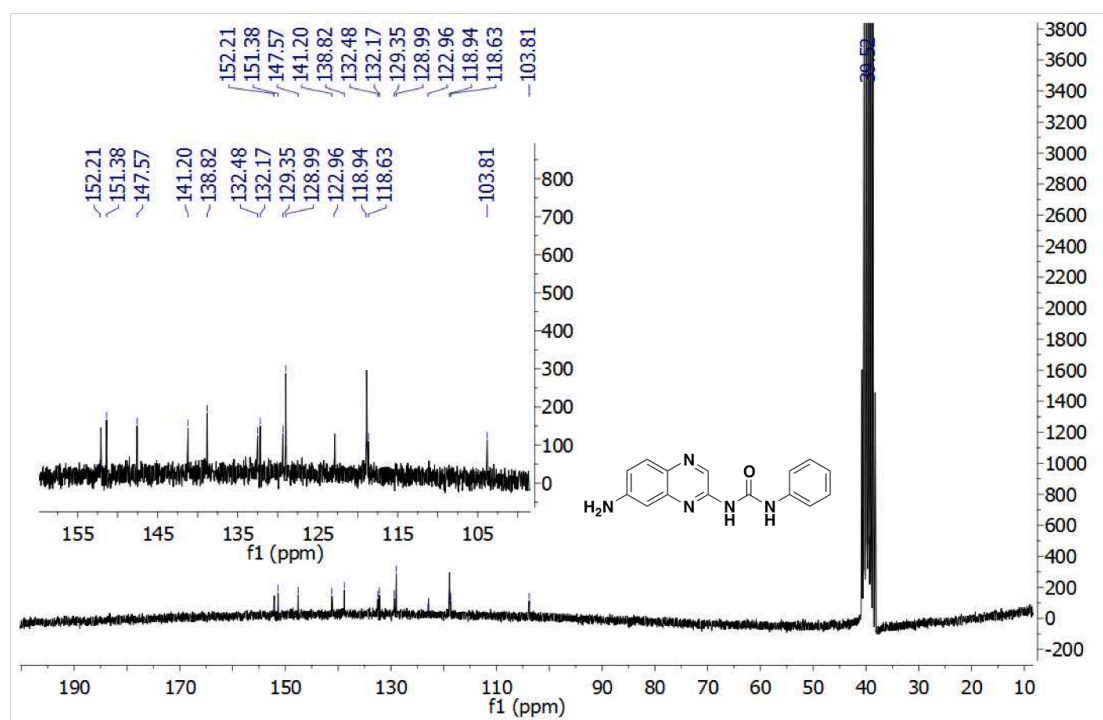

**Figure S32.**  $^{13}\text{C}$  NMR spectrum of compound 1-(7-aminoquinoxalin-2-yl)-3-phenylurea (**10c**) (DMSO- $d_6$ /50MHz/TMS)

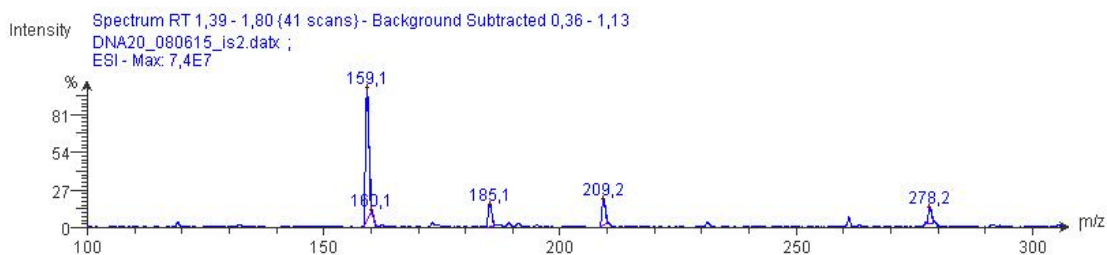

**Figure S33.** Mass spectrometry of compound 1-(7-aminoquinoxalin-2-yl)-3-phenylurea (**10c**) in negative mode (ESI-).

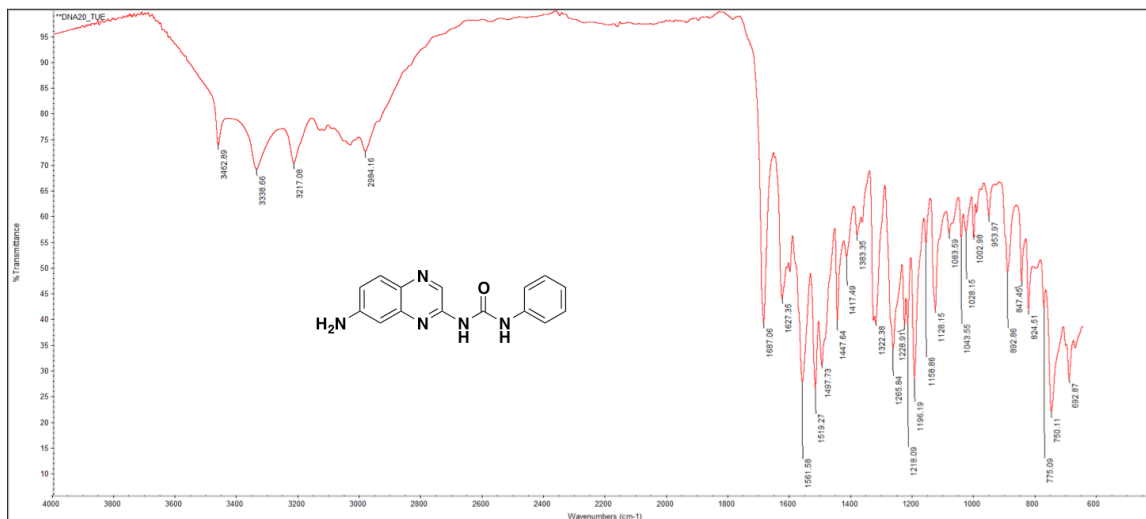

**Figure S34.** Infra red spectrum (ATR-FTIR) of compound 1-(7-aminoquinoxalin-2-yl)-3-phenylurea (**10c**) (bands in  $\text{cm}^{-1}$ )

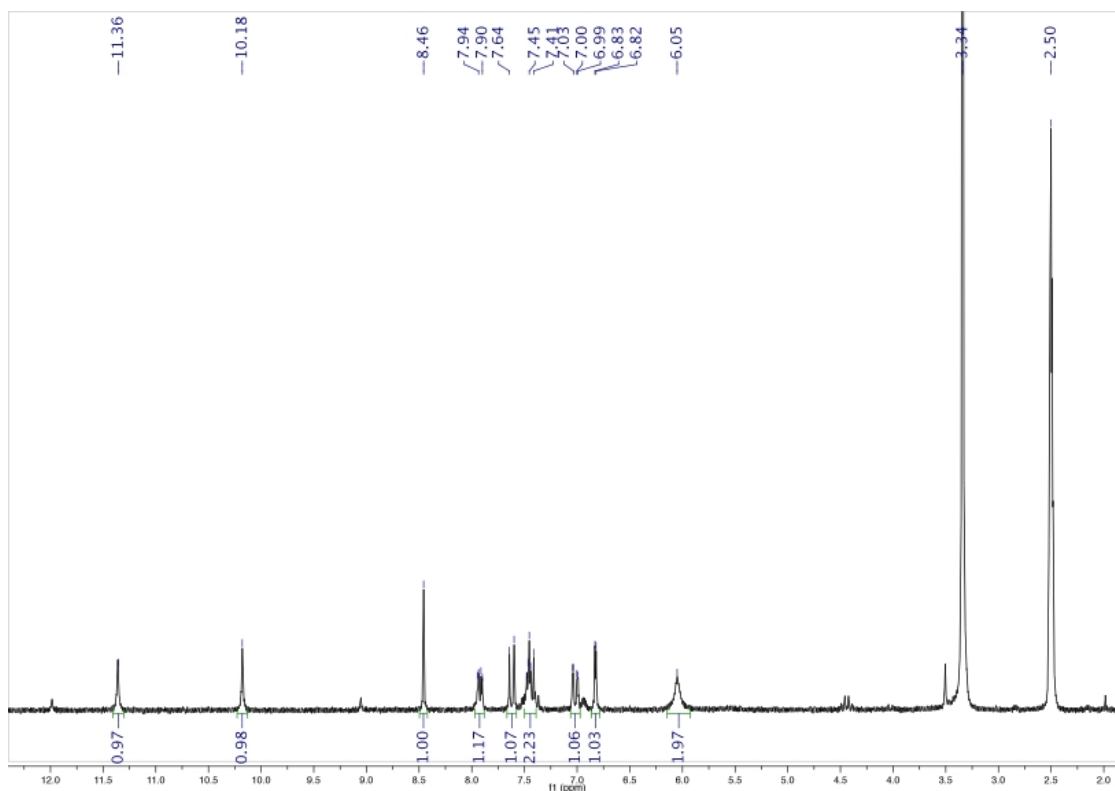

**Figure S35.**  $^1\text{H}$  NMR spectrum of compound 1-(7-aminoquinoxalin-2-yl)-3-(3-chloro-4-fluorophenyl) urea (**10d**) ( $\text{DMSO-d}_6/200\text{MHz/TMS}$ )



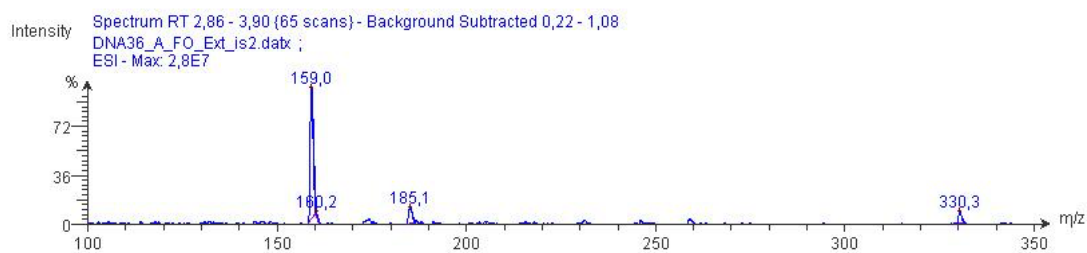

**Figure S36.** Mass spectrometry of compound 1 - (7-aminoquinoxalin-2-yl)-3-(3-chloro-4-fluorophenyl) urea (**10d**) in negative mode (ESI-).

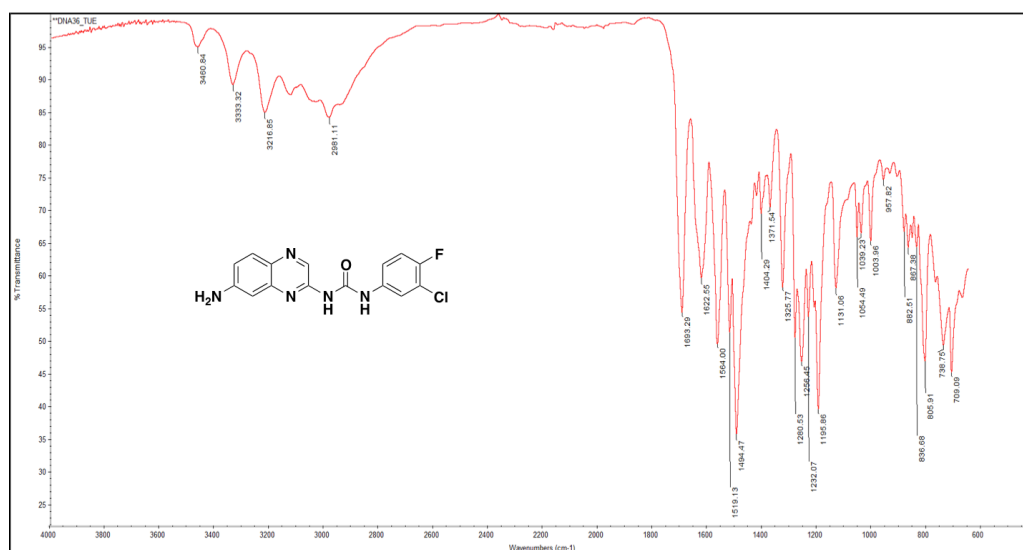

**Figure S37.** Infra red spectrum (ATR-FTIR) of compound 1 - (7-aminoquinoxalin-2-yl)-3-(3-chloro-4-fluorophenyl) urea (**10d**) (bands in cm<sup>-1</sup>).

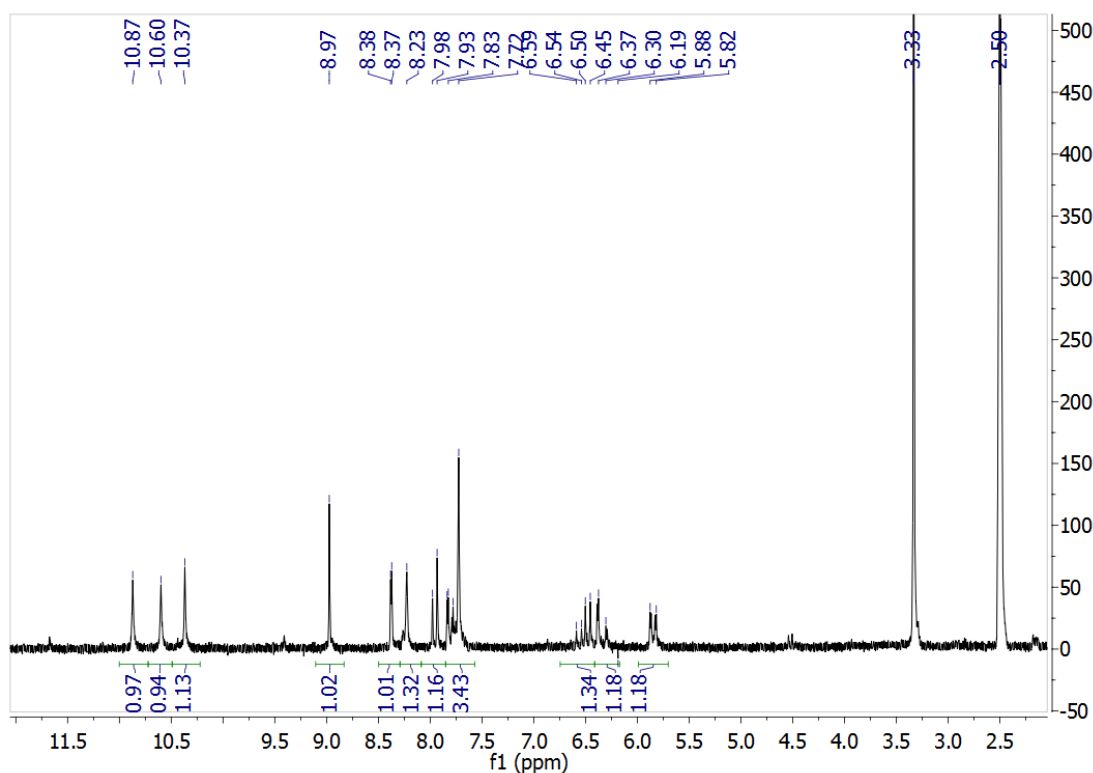

**Figure S38.**  $^1\text{H}$  NMR spectrum of compound *N*-(3-(3-(4-chloro-3-(trifluoromethyl)phenyl)ureido)quinoxalin-6-yl)acrylamide (**7a**) (DMSO- $d_6$ /200MHz/TMS)

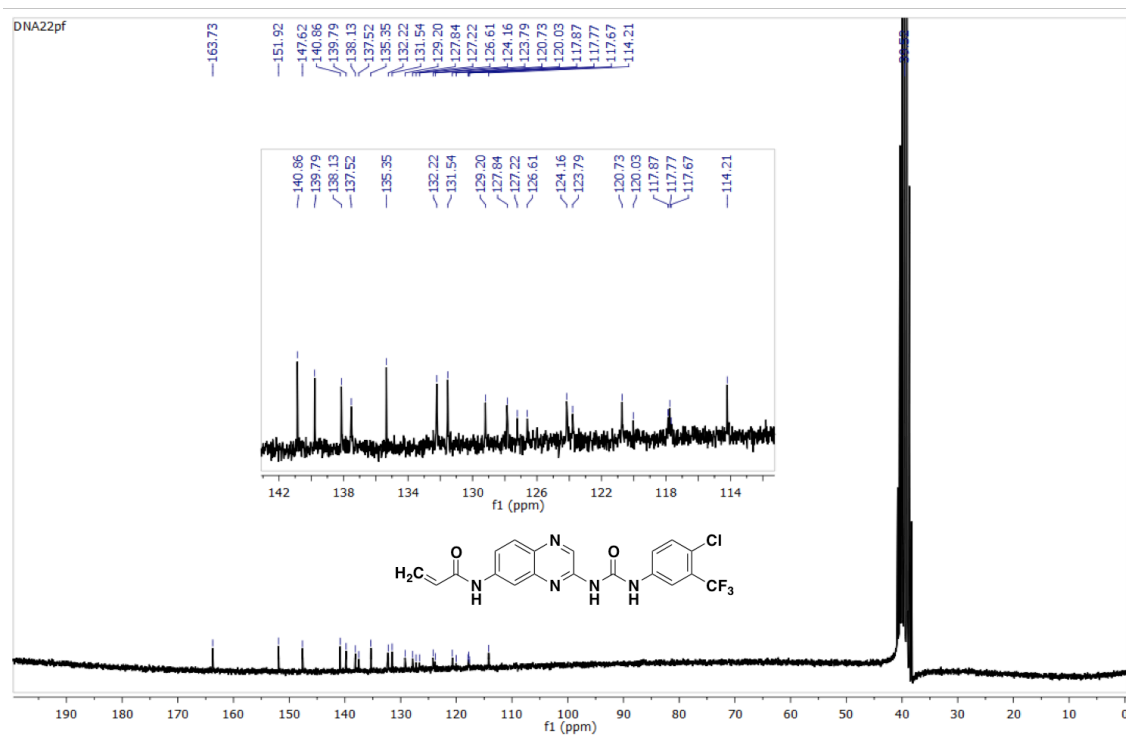

**Figure S39.**  $^{13}\text{C}$  NMR spectrum of compound *N*-(3-(3-(4-chloro-3-(trifluoromethyl)phenyl)ureido)quinoxalin-6-yl)acrylamide (**7a**) (DMSO- $d_6$ /50MHz/TMS)

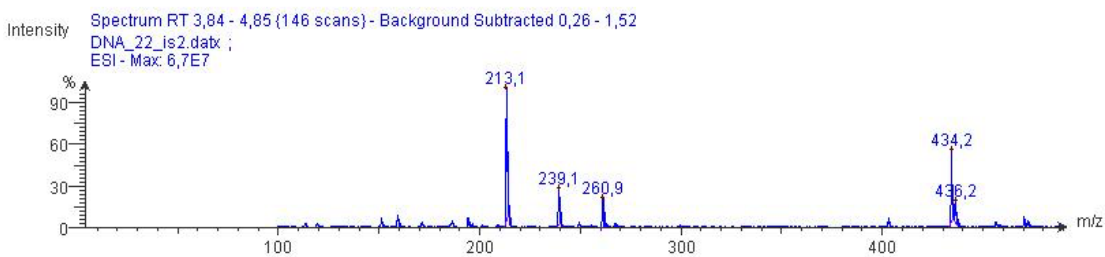

**Figure S40.** Mass spectrometry of compound *N*-(3-(3-(4-chloro-3-(trifluoromethyl)phenyl)ureido)quinoxalin-6-yl)acrylamide (**7a**) in negative mode (ESI-).

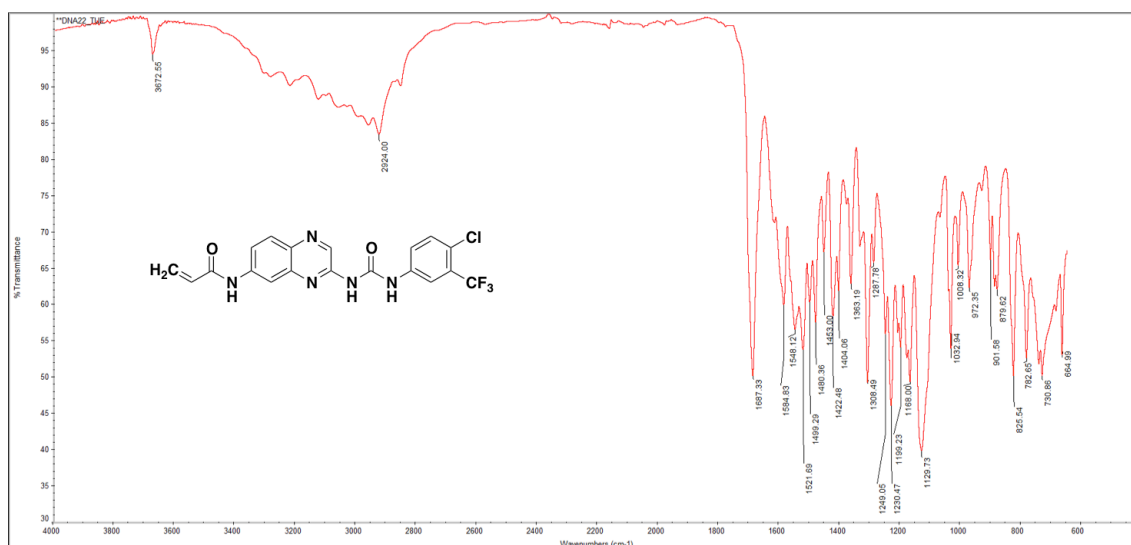

**Figure S41.** Infra red spectrum (ATR-FTIR) of compound *N*-(3-(3-(4-chloro-3-(trifluoromethyl)phenyl)ureido)quinoxalin-6-yl)acrylamide (**7a**) (bands in  $\text{cm}^{-1}$ ).

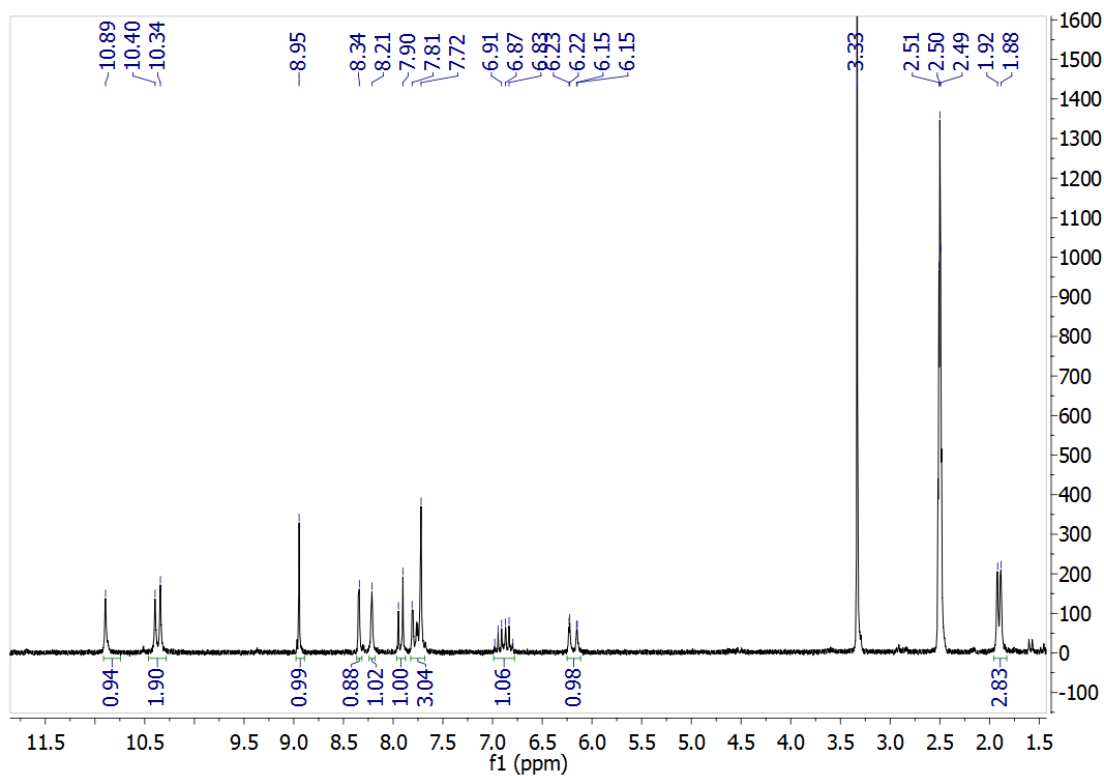

**Figure S42.**  $^1\text{H}$  NMR spectrum of compound (*E*)-*N*-(3-(3-(4-chloro-3-(trifluoromethyl)phenyl)ureido)quinoxalin-6-yl)but-2-enamide (**7b**) ( $\text{DMSO-d}_6/200\text{MHz/TMS}$ )

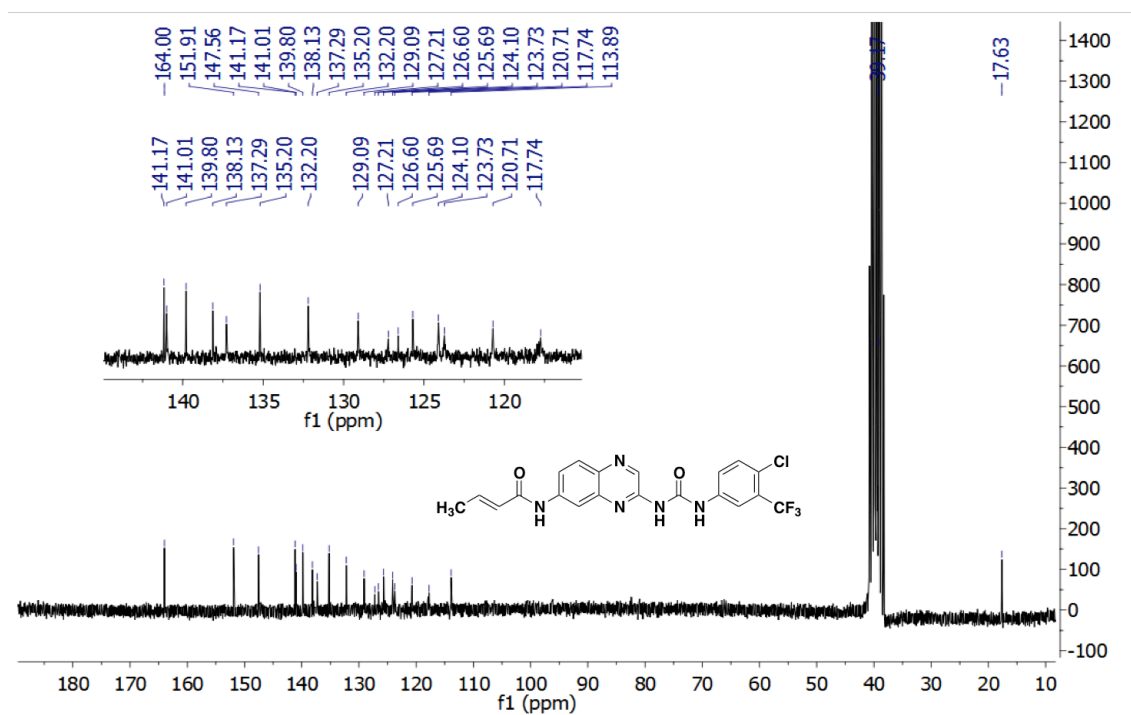

**Figure S43.**  $^{13}\text{C}$  NMR spectrum of compound (*E*)-*N*-(3-(3-(4-chloro-3-(trifluoromethyl)phenyl)ureido)quinoxalin-6-yl)but-2-enamide (**7b**) ( $\text{DMSO-d}_6/50\text{MHz/TMS}$ ).

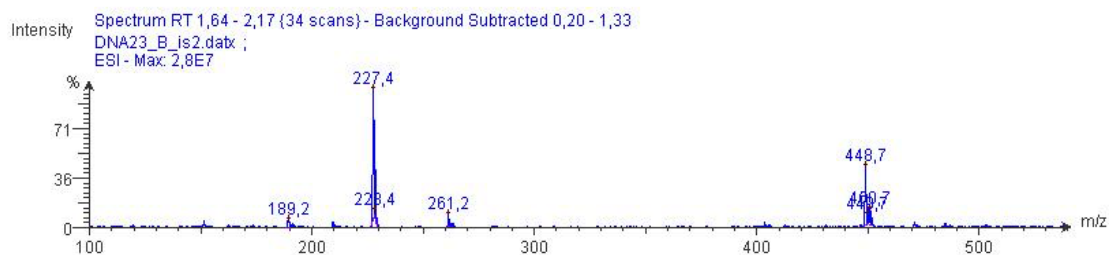

**Figure S44.** Mass spectrometry of compound (*E*)-*N*-(3-(3-(4-chloro-3-(trifluoromethyl)phenyl)ureido) quinoxalin-6-yl)but-2-enamide (**7b**) in negative mode (ESI-).

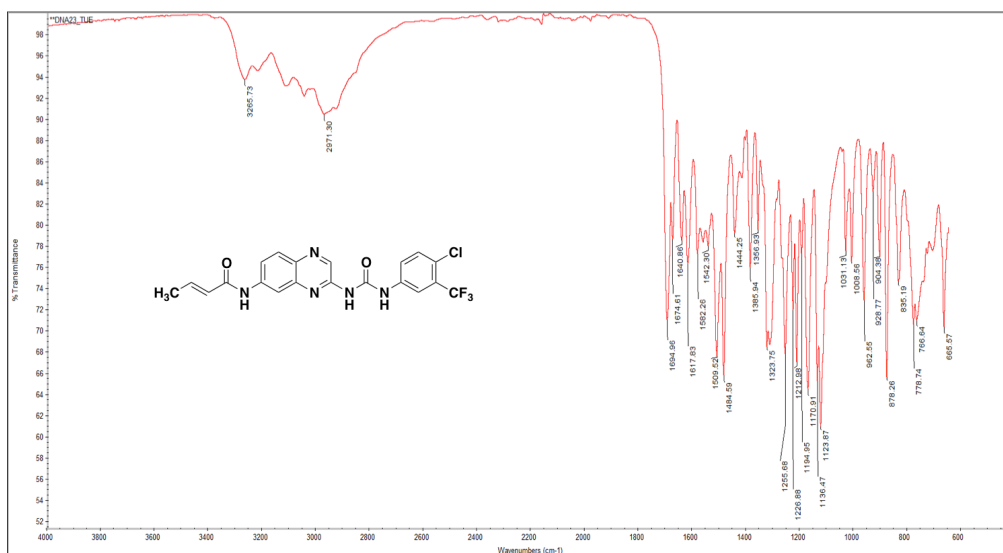

**Figure S45.** Infra red spectrum (ATR-FTIR) of compound (*E*)-*N*-(3-(3-(4-chloro-3-(trifluoromethyl)phenyl)ureido) quinoxalin-6-yl)but-2-enamide (**7b**) (bands in cm<sup>-1</sup>).

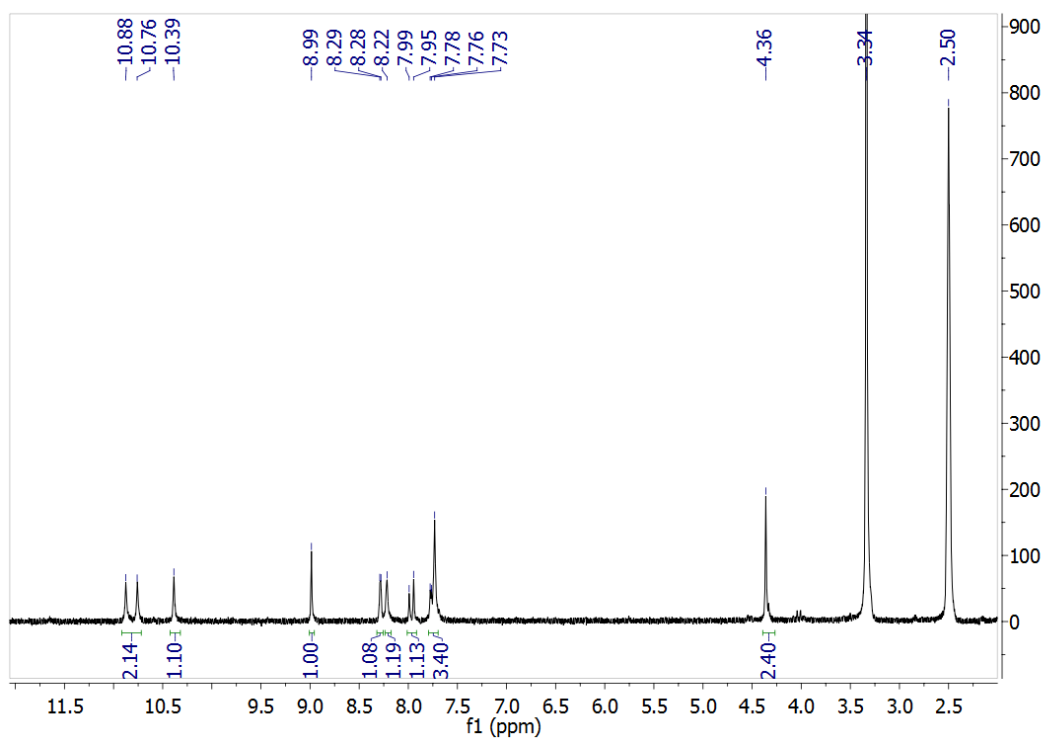

**Figure S46.** <sup>1</sup>H NMR spectrum of compound 2-chloro-*N*-(3-(3-(4-chloro-3-(trifluoromethyl)phenyl)ureido) quinoxalin-6-yl)acetamide (**7c**) (DMSO-d<sub>6</sub>/200MHz/TMS)

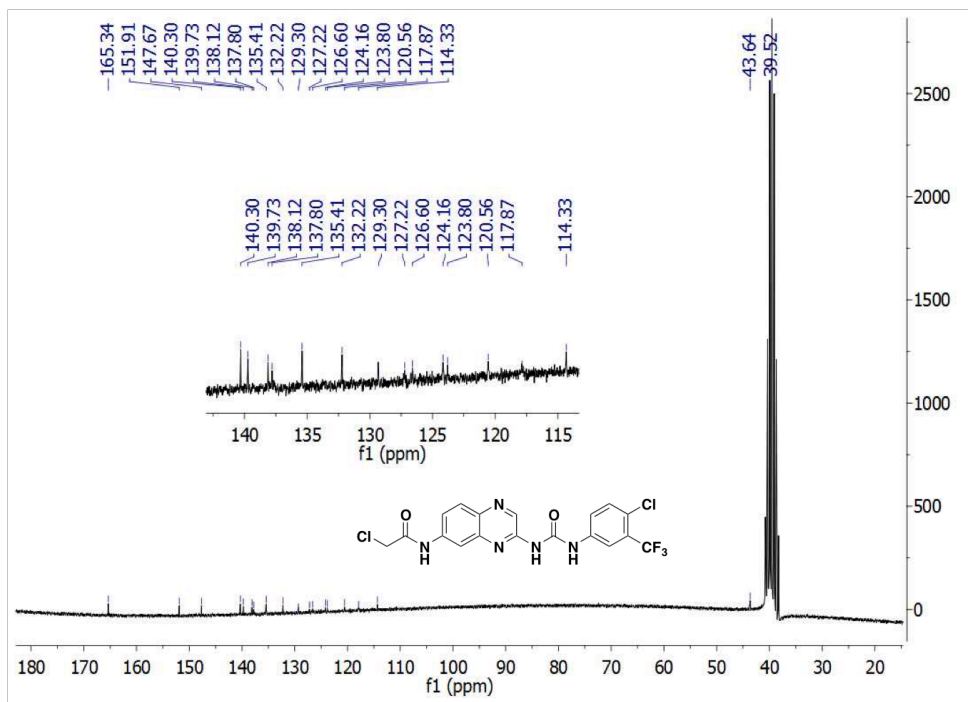

**Figure S47.** <sup>13</sup>C NMR spectrum of compound 2-chloro-*N*-(3-(3-(4-chloro-3-(trifluoromethyl)phenyl)ureido)quinoxalin-6-yl)acetamide (**7c**) (DMSO-*d*<sub>6</sub>/50MHz/TMS)

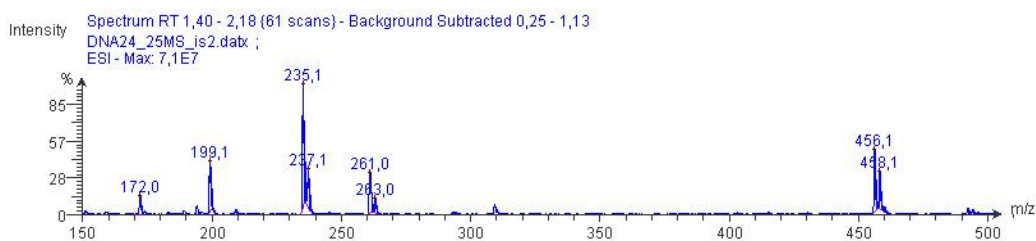

**Figure S48.** Mass spectrometry of compound 2-chloro-*N*-(3-(3-(4-chloro-3-(trifluoromethyl)phenyl)ureido)quinoxalin-6-yl)acetamide (**7c**) in negative mode (ESI-).

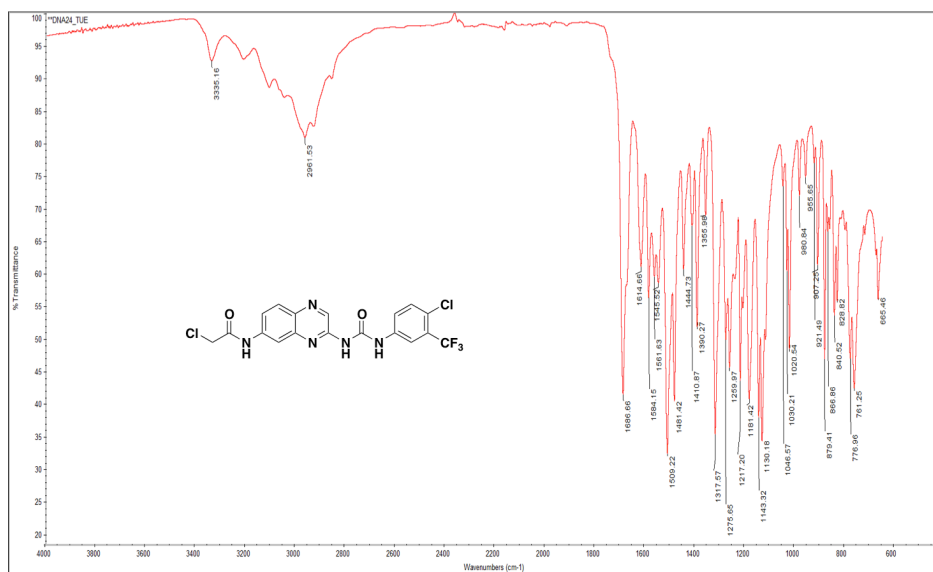

**Figure S49.** Infra red spectrum (ATR-FTIR) of compound 2-chloro-*N*-(3-(3-(4-chloro-3-(trifluoromethyl)phenyl)ureido)quinoxalin-6-yl)acetamide (**7c**) (bands in cm<sup>-1</sup>).



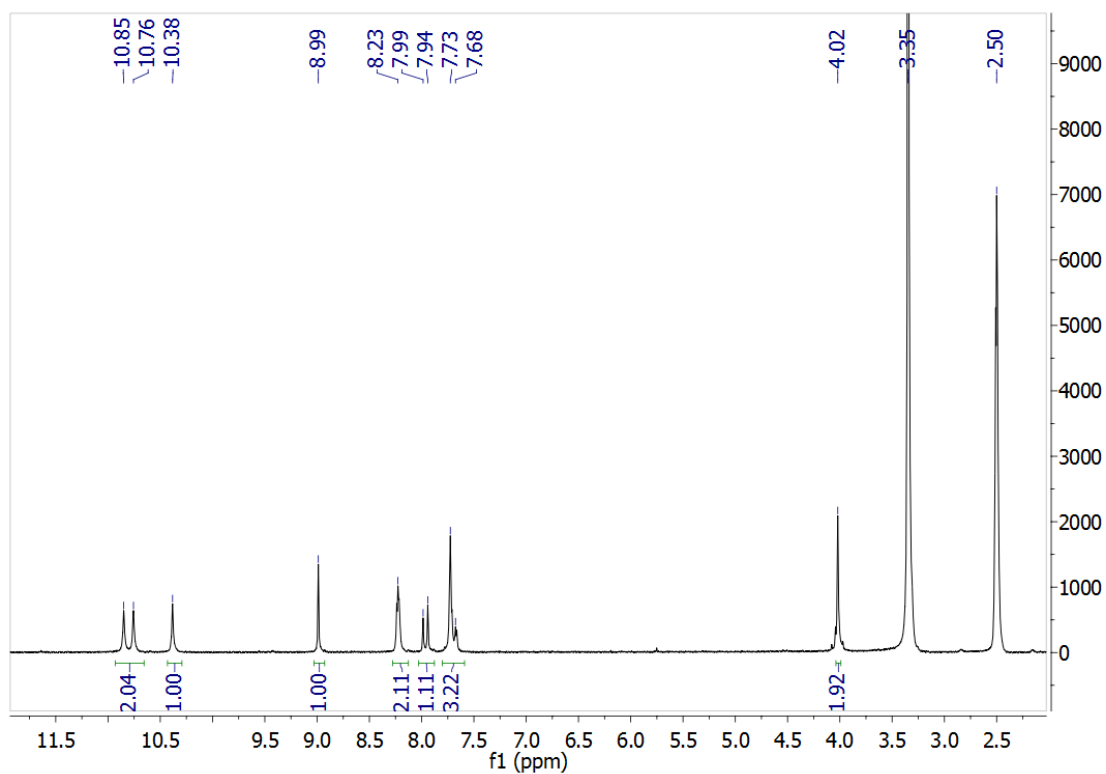

**Figure S50.**  $^1\text{H}$  NMR spectrum of compound 2-chloro- *N*-(3-(3-(4-chloro-3-(trifluoromethyl)phenyl)ureido)quinoxalin-6-yl)-2-cianoacetamide (**7d**) (DMSO- $d_6$ /200MHz/TMS)

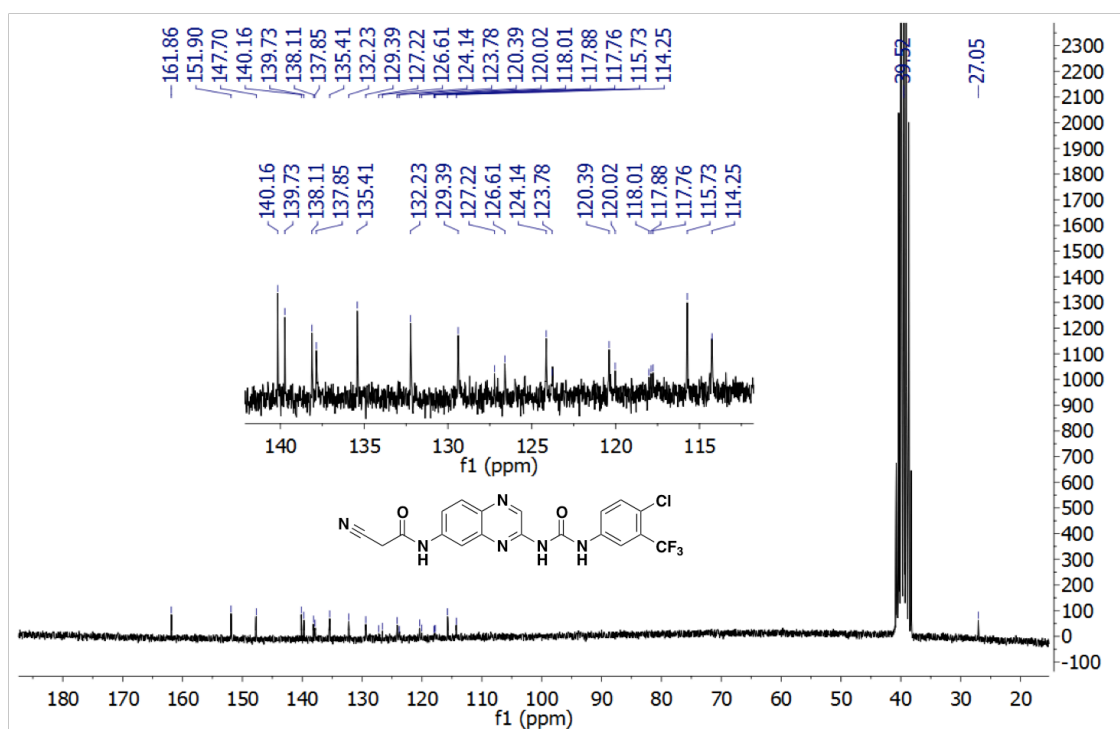

**Figure S51.**  $^{13}\text{C}$  NMR spectrum of compound 2-chloro- *N*-(3-(3-(4-chloro-3-(trifluoromethyl)phenyl)ureido)quinoxalin-6-yl)-2-cianoacetamide (**7d**) (DMSO- $d_6$ /50MHz/TMS)

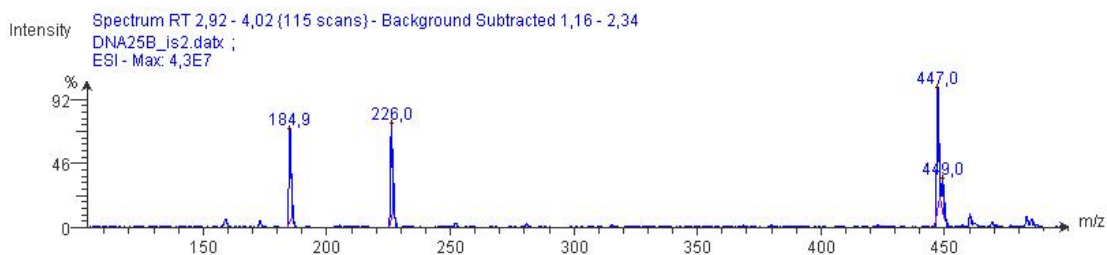

**Figure S52.** Mass spectrometry of compound *N*-(3-(3-(4-chloro-3-(trifluoromethyl)phenyl)ureido)quinoxalin-6-yl)-2-cianoacetamide (**7d**) in negative mode (ESI-).

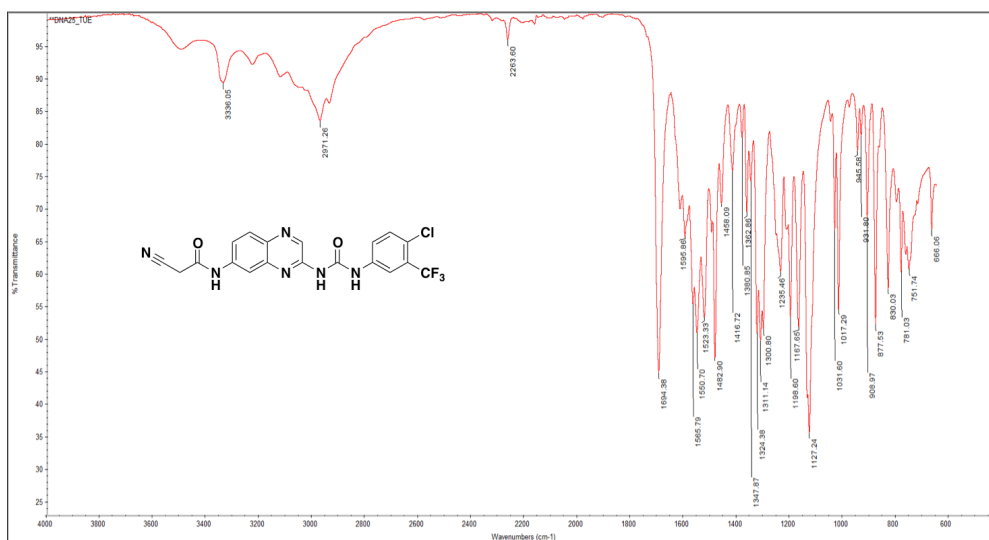

**Figure S53.** Infra red spectrum (ATR-FTIR) of compound *N*-(3-(3-(4-chloro-3-(trifluoromethyl)phenyl)ureido)quinoxalin-6-yl)-2-cianoacetamide (**7d**) (bands in  $\text{cm}^{-1}$ ).

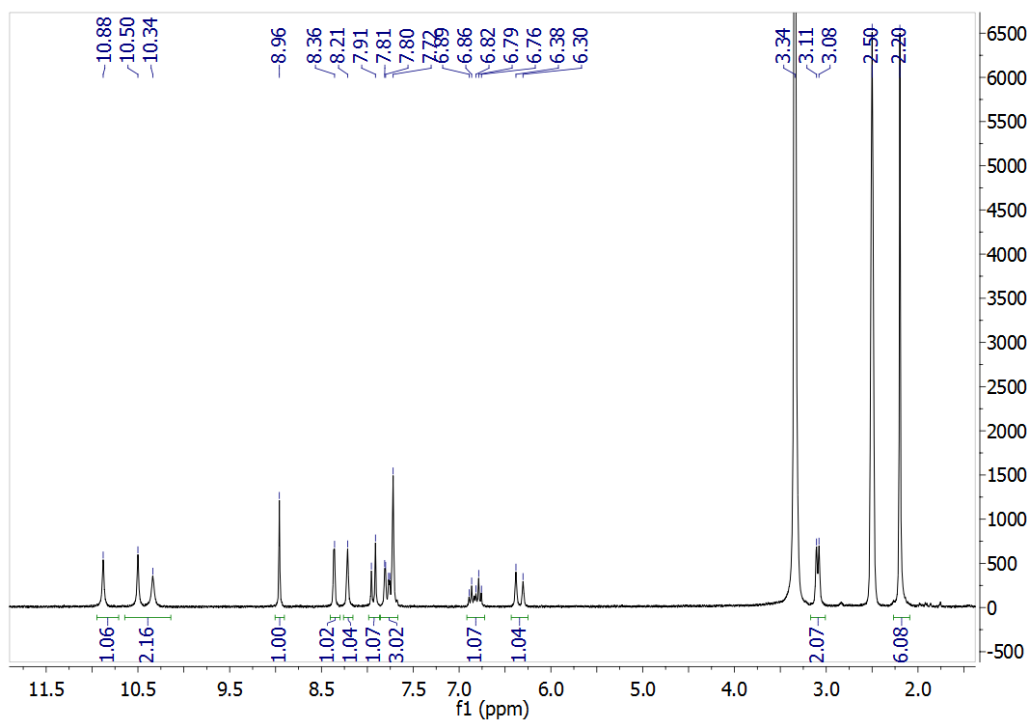

**Figure S54.**  $^1\text{H}$  NMR spectrum of compound (*E*)-*N*-(3-(3-(4-chloro-3-(trifluoromethyl)phenyl)ureido)quinoxalin-6-yl)-4-(dimethylamino)but-2-enamide (**7e**) ( $\text{DMSO}-d_6/200\text{MHz/TMS}$ )

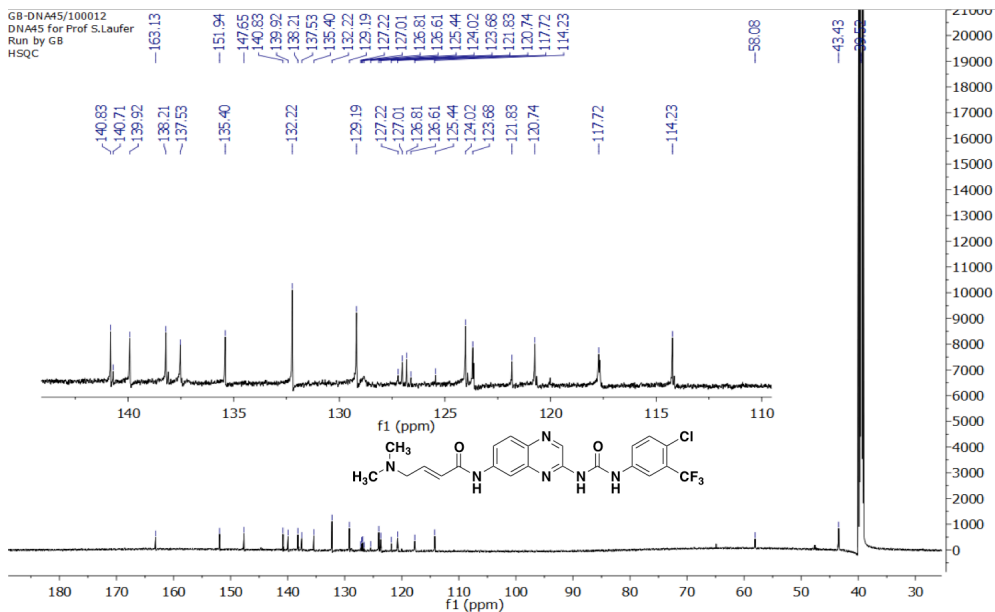

**Figure S55.**  $^{13}\text{C}$  NMR spectrum of compound (*E*)-*N*-(3-(3-(4-chloro-3-(trifluoromethyl)phenyl)ureido)quinoxalin-6-yl)-4-(dimethylamino)but-2-enamide (**7e**) (DMSO- $d_6$ /150MHz/TMS)

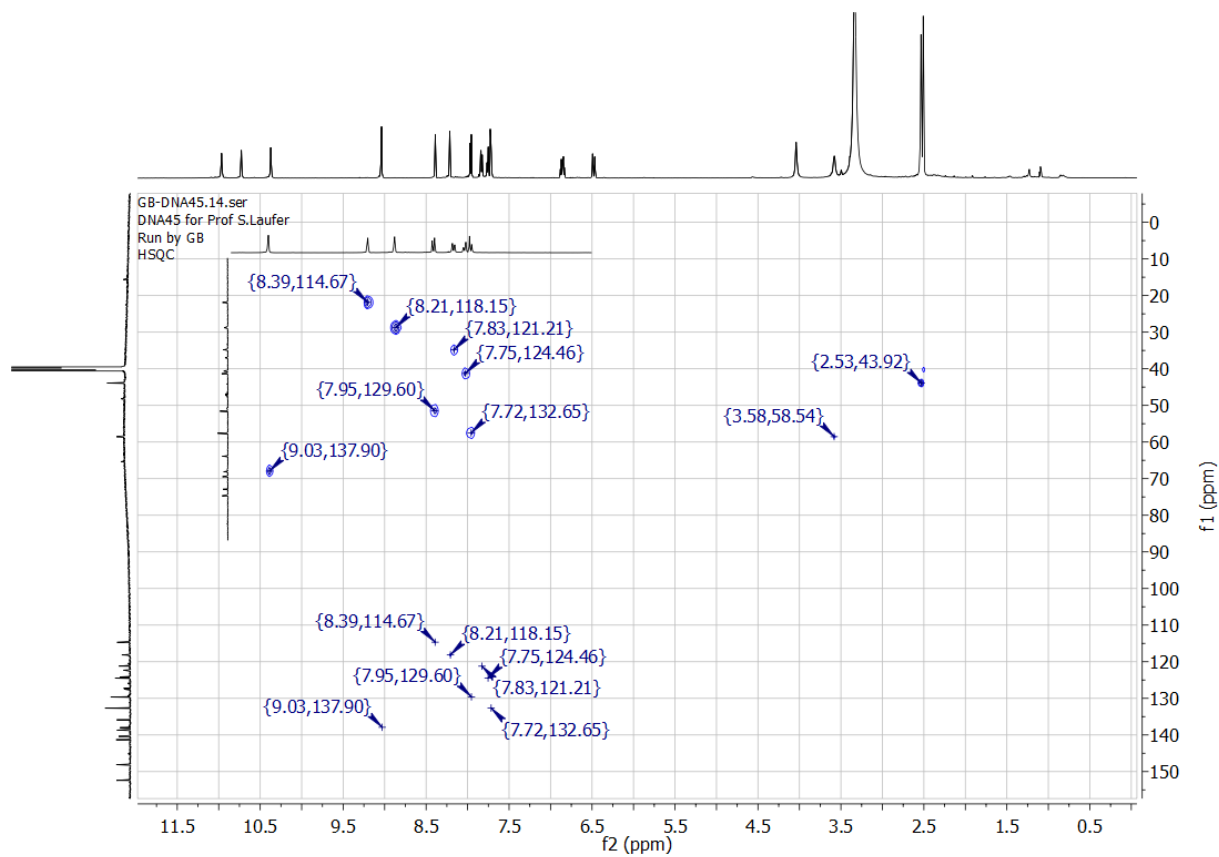

**Figure S56.** HSQC spectrum of compound (*E*)-*N*-(3-(3-(4-chloro-3-(trifluoromethyl)phenyl)ureido)quinoxalin-6-yl)-4-(dimethylamino)but-2-enamide (**7e**) (DMSO- $d_6$ /150MHz/TMS)

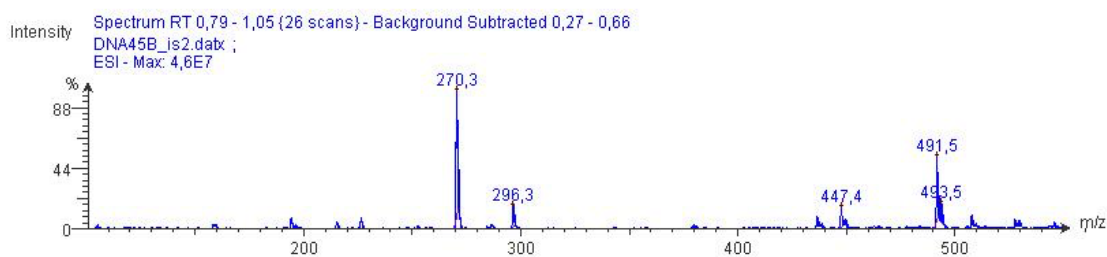

**Figure S57.** Mass spectrometry of compound *E*-*N*-(3-(3-(4-chloro-3-(trifluoromethyl) phenyl)ureido) quinoxalin-6-yl)-4-(dimethylamino)but-2-enamide (**7e**) in negative mode (ESI).

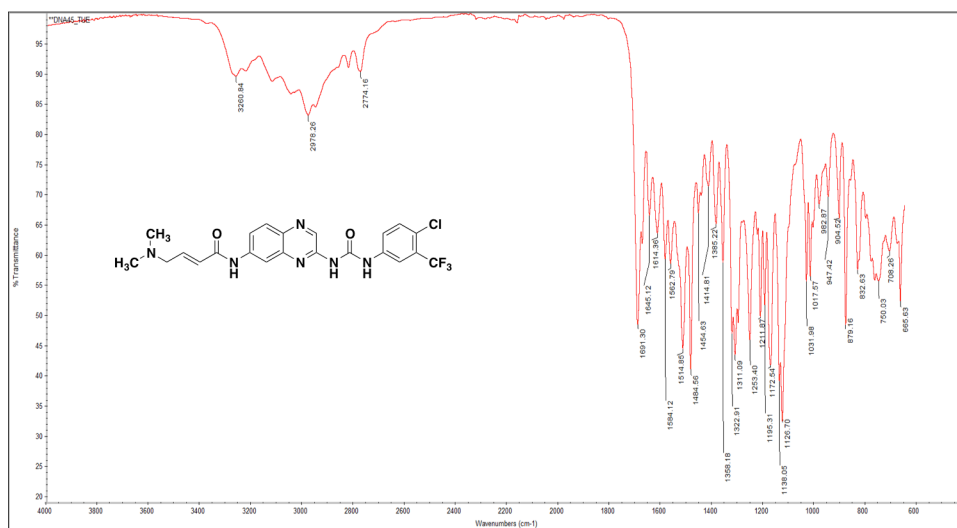

**Figure S58.** Infra red spectrum (ATR-FTIR) of compound *E*-*N*-(3-(3-(4-chloro-3-(trifluoromethyl) phenyl)ureido) quinoxalin-6-yl)-4-(dimethylamino)but-2-enamide (**7e**) (bands in cm<sup>-1</sup>).

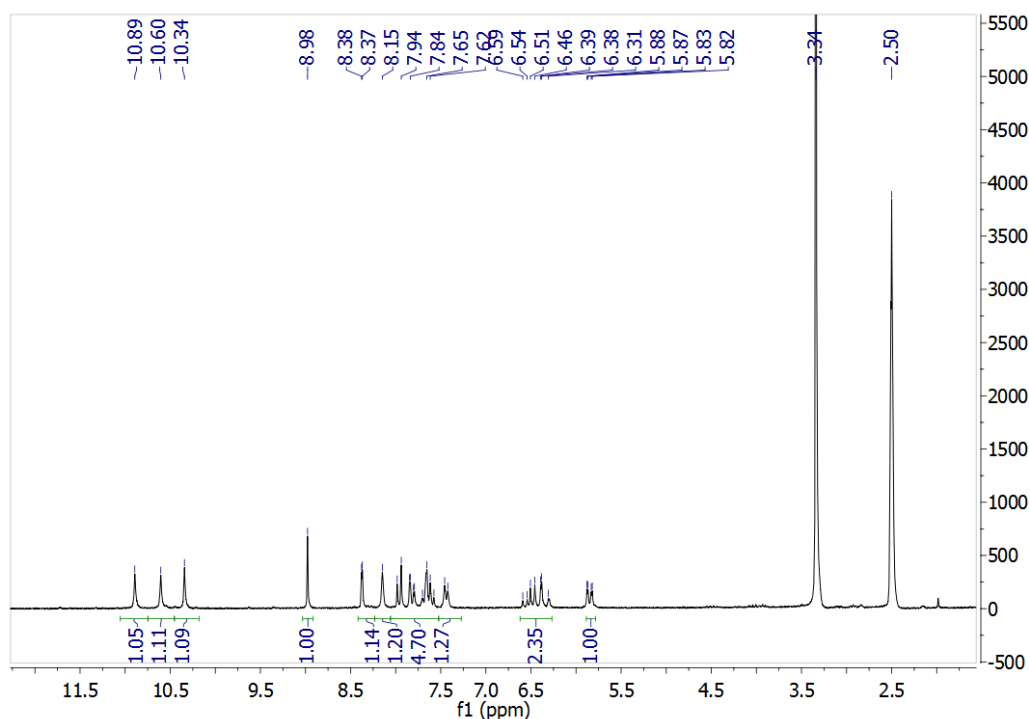

**Figure S59.** <sup>1</sup>H NMR spectrum of compound *N*-(3-(3-(3-(trifluoromethyl)phenyl)ureido) quinoxalin-6-yl)acrylamide (**7f**) (DMSO-d<sub>6</sub>/200MHz/TMS)



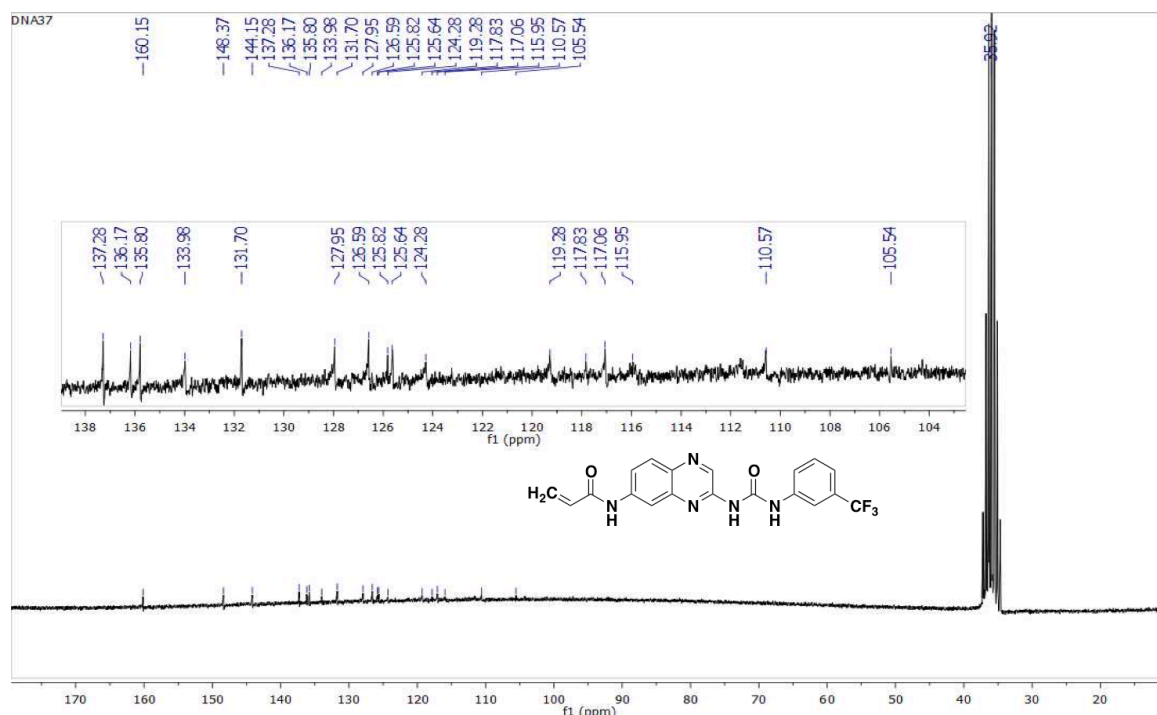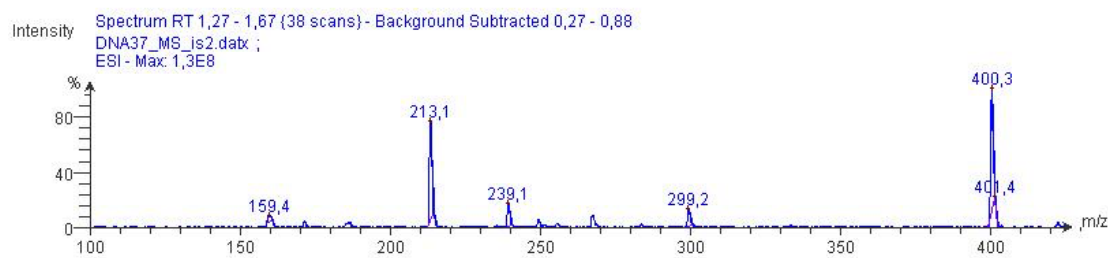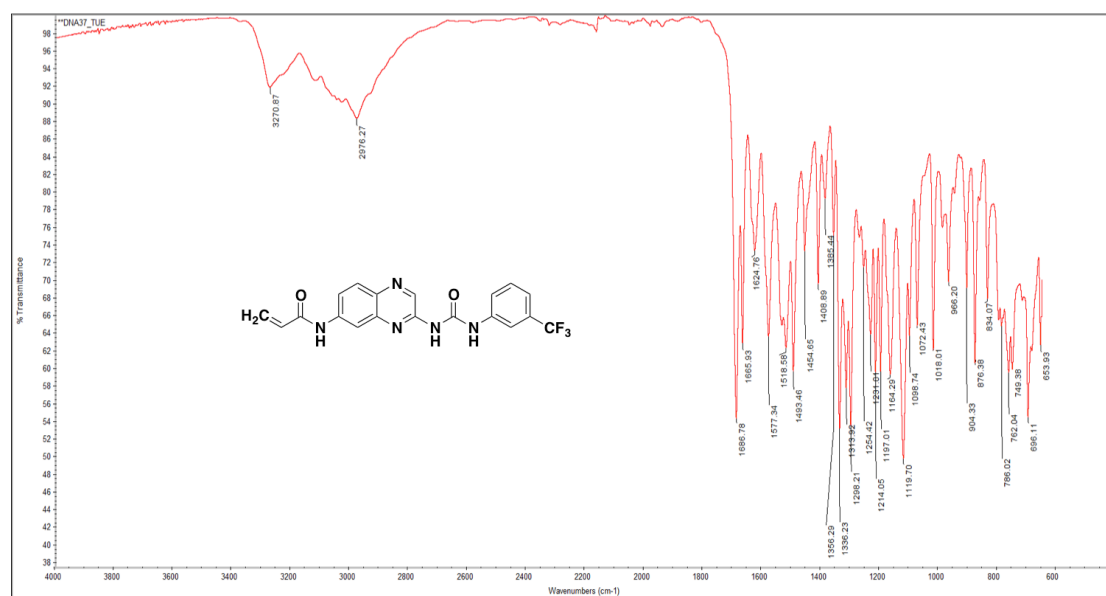

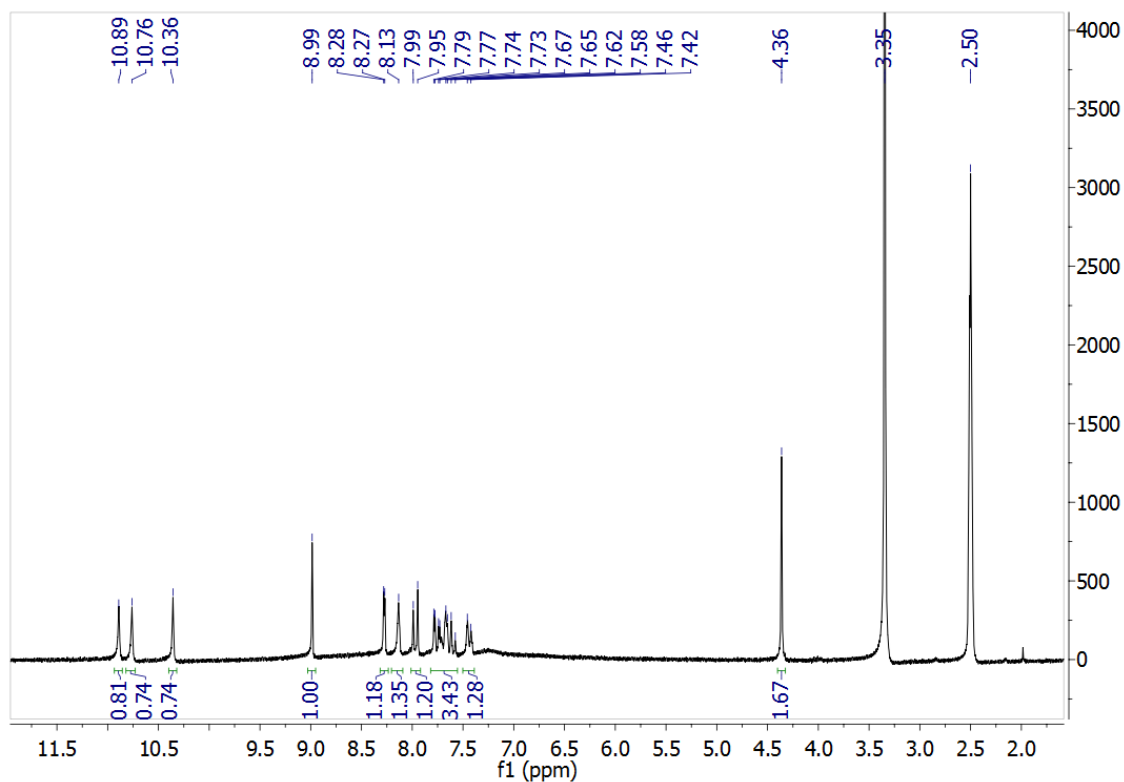

**Figure S63.**  $^1\text{H}$  NMR spectrum of compound 2-chloro-*N*-(3-(3-(3-(trifluoromethyl) phenyl)ureido) quinoxalin-6-yl) acetamide (**7g**) (DMSO- $d_6$ /200MHz/TMS)

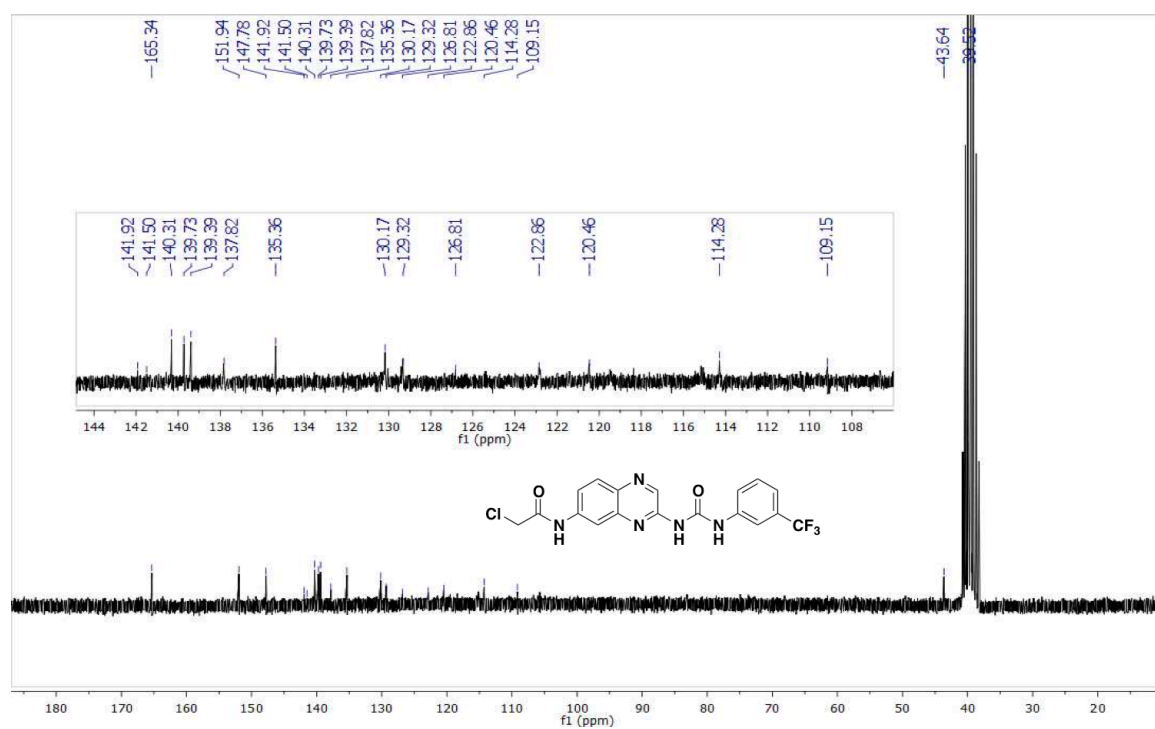

**Figure S64.**  $^{13}\text{C}$  NMR spectrum of compound 2-chloro-*N*-(3-(3-(3-(trifluoromethyl)phenyl) ureido) quinoxalin-6-yl) acetamide (**7g**) (DMSO- $d_6$ /50MHz/TMS)

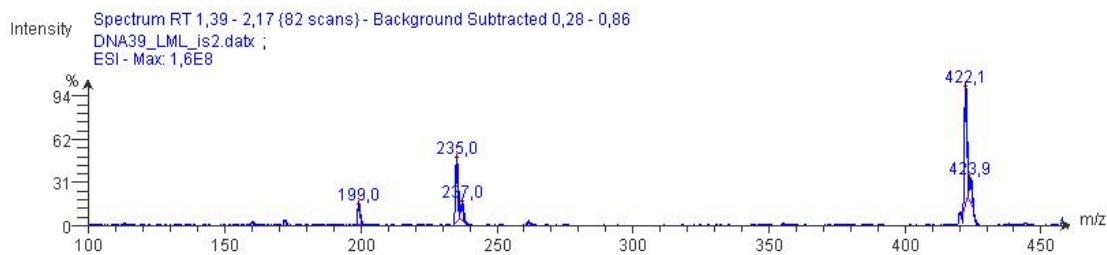

**Figure S65.** Mass spectrometry of compound 2-chloro-*N*-(3-(3-(3-(trifluoromethyl)phenyl) ureido) quinoxalin-6-yl) acetamide (**7g**) in negative mode (ESI-).

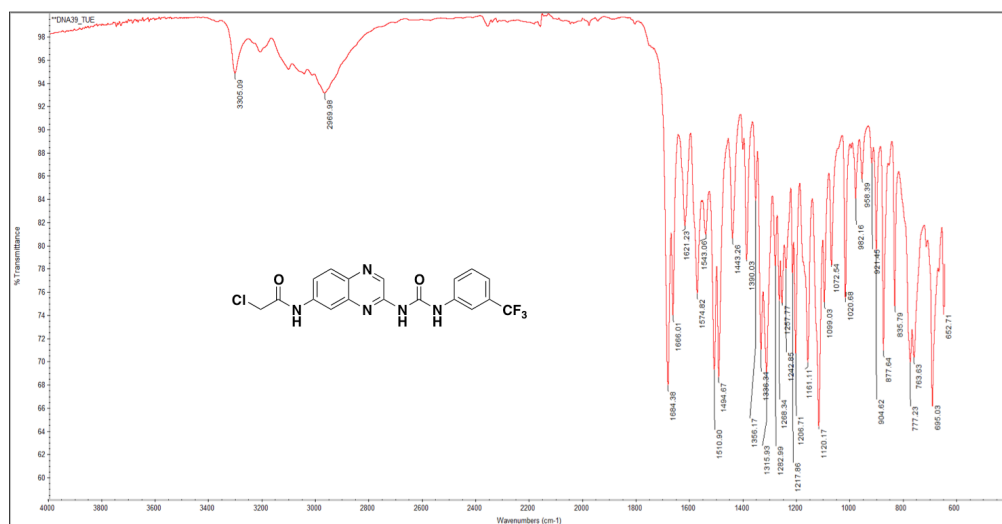

**Figure S66.** Infra red spectrum (ATR-FTIR) do 2-chloro-*N*-(3-(3-(3-(trifluoromethyl)phenyl) ureido) quinoxalin-6-yl) acetamide (**7g**) (bands in cm<sup>-1</sup>).

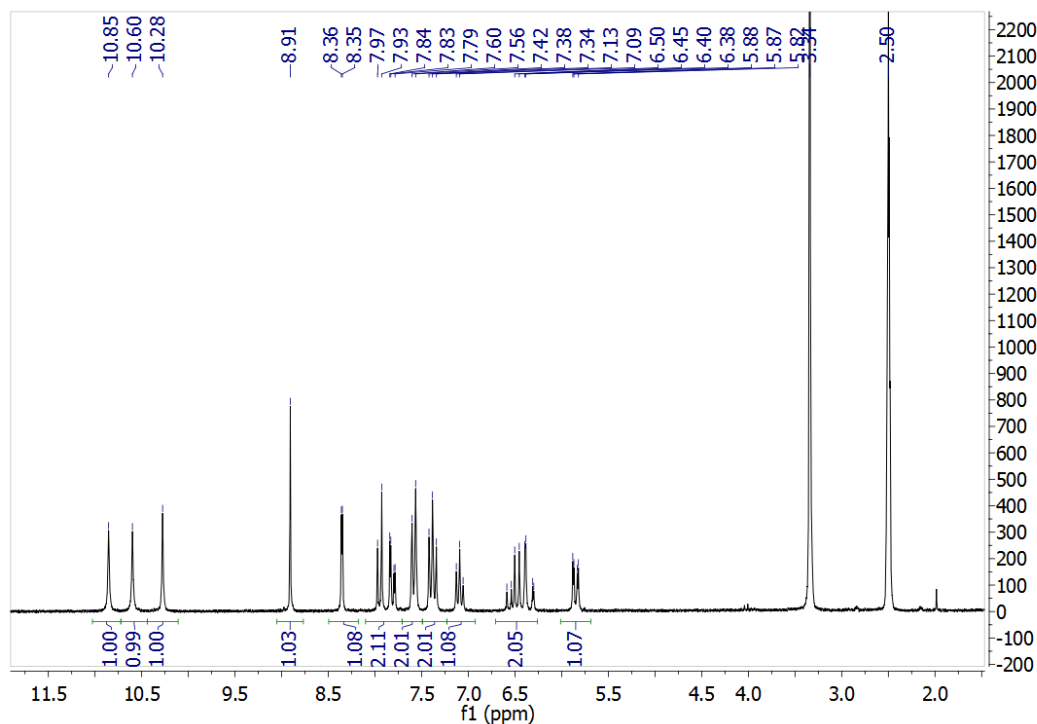

**Figure S67.** <sup>1</sup>H NMR spectrum of compound *N*-(3-(3-phenylureido)quinoxalin-6-yl)acrylamide (**7h**) (DMSO-*d*<sub>6</sub>/200MHz/TMS)

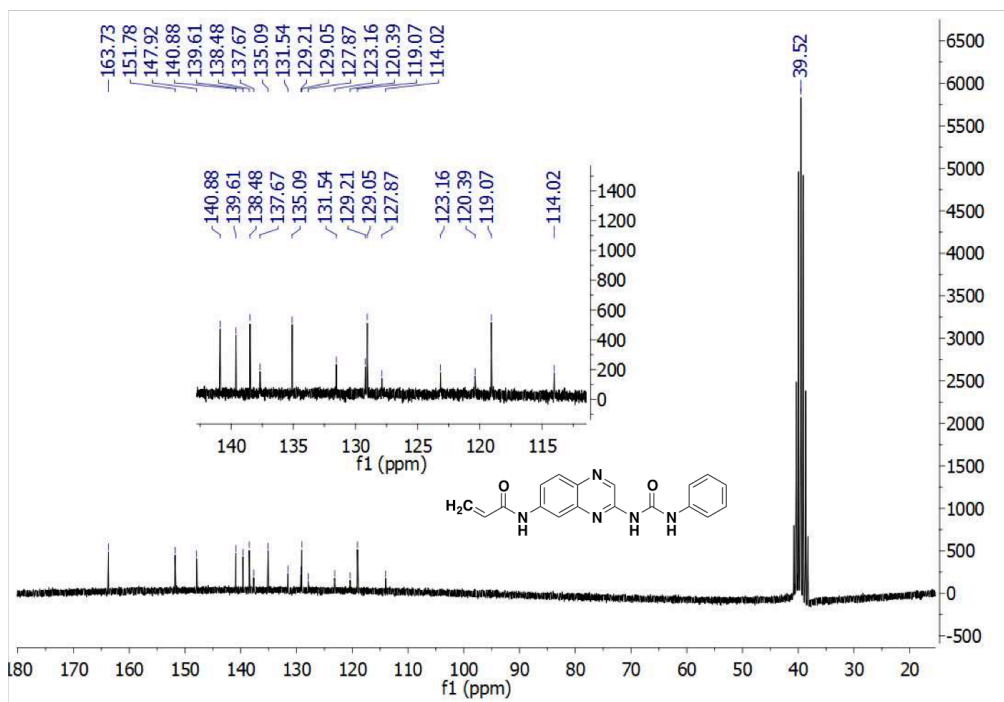

**Figure S68.** <sup>13</sup>C NMR spectrum of compound *N*-(3-(3-phenylureido)quinoxalin-6-yl)acrylamide (**7h**) (DMSO-d<sub>6</sub>/50MHz/TMS)

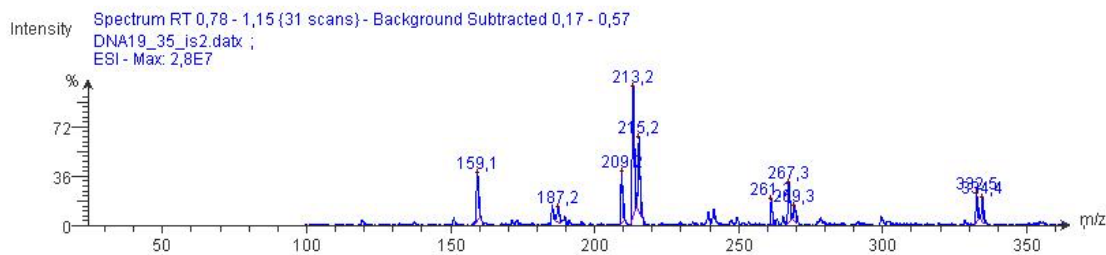

**Figure S69.** Mass spectrometry of compound *N*-(3-(3-phenylureido)quinoxalin-6-yl)acrylamide (**7h**) in negative mode (ESI-).

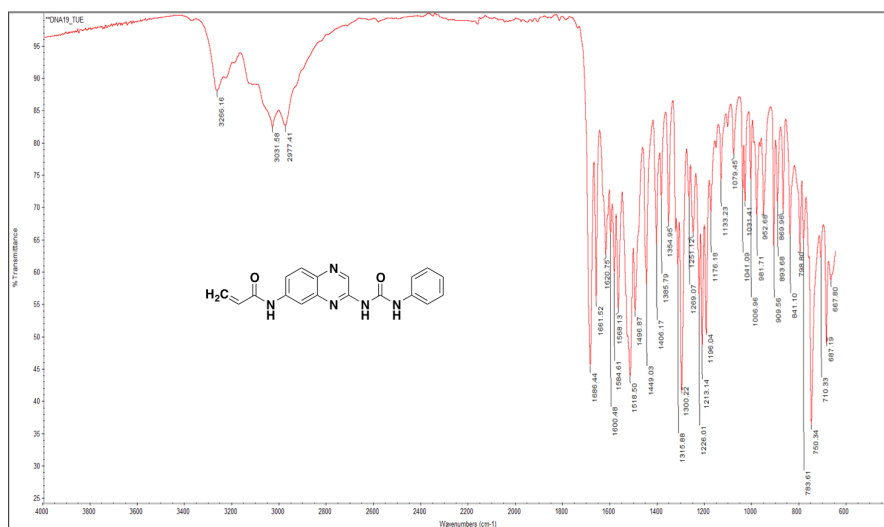

**Figure S70.** Infra red spectrum (ATR-FTIR) of compound *N*-(3-(3-phenylureido)quinoxalin-6-yl)acrylamide (**7h**) (bands in cm<sup>-1</sup>).

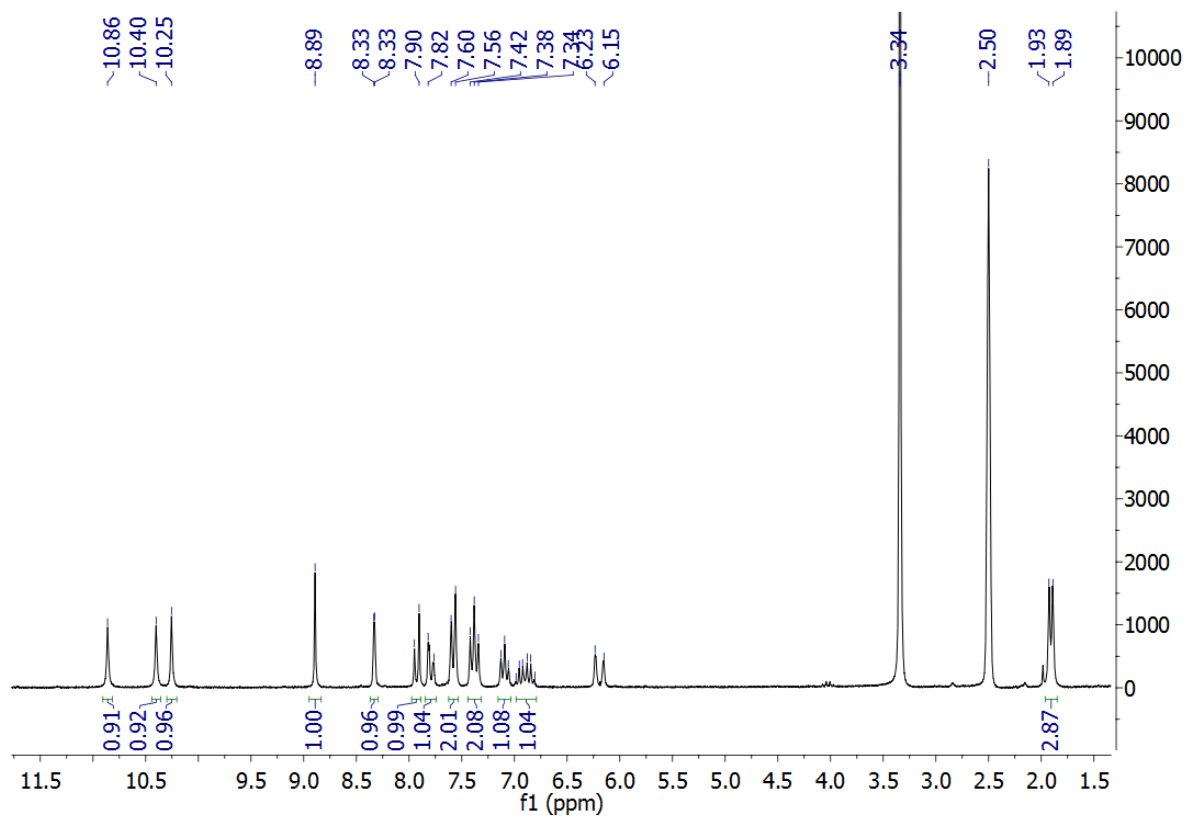

**Figure S71.**  $^1\text{H}$  NMR spectrum of compound 1(*E*)-*N*-(3-(3-phenylureido)quinoxalin-6-yl)but-2-enamide (**7i**) (DMSO- $d_6$ /200MHz/TMS)

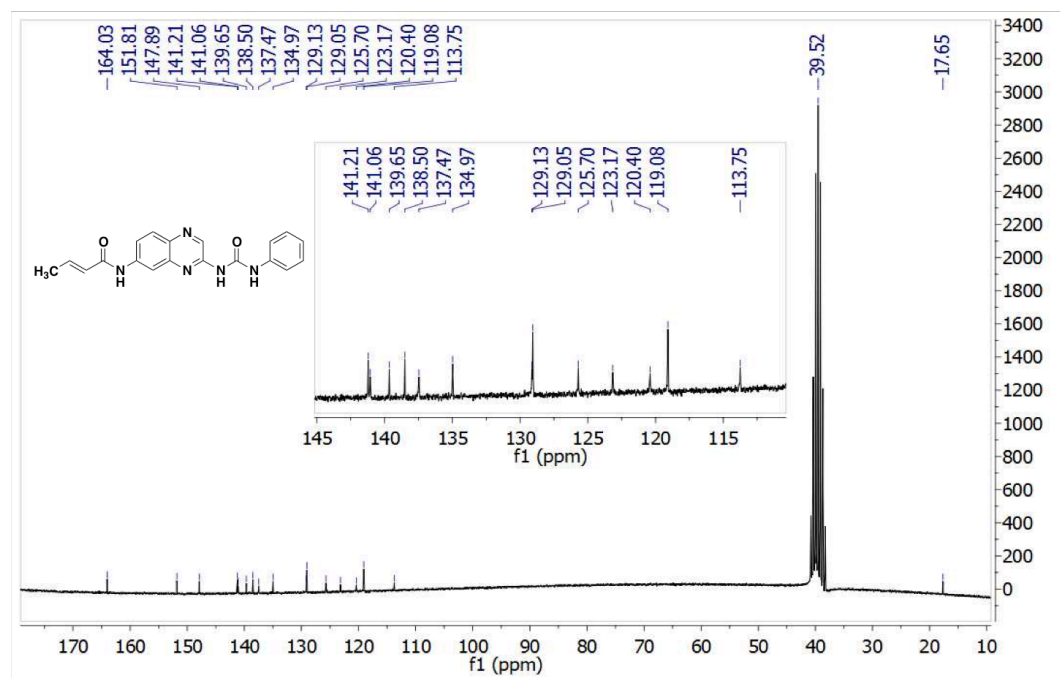

**Figure S72.**  $^{13}\text{C}$  NMR spectrum of compound (*E*)-*N*-(3-(3-phenylureido)quinoxalin-6-yl)but-2-enamide (**7i**) (DMSO- $d_6$ /50MHz/TMS)

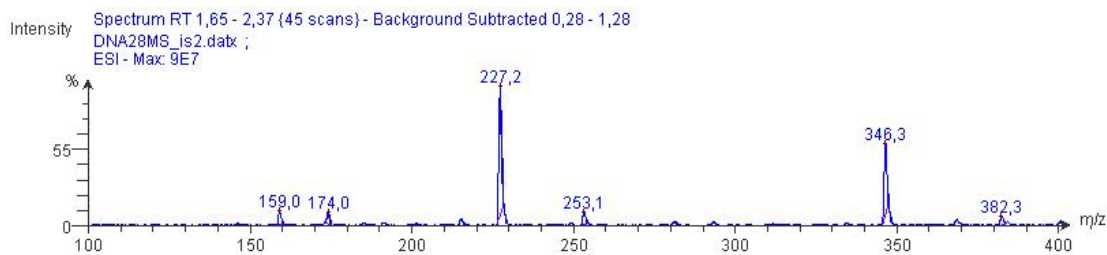

**Figure S73.** Mass spectrometry of compound (*E*)-*N*-(3-(3-phenylureido)quinoxalin-6-yl)but-2-enamide (**7i**) in negative mode (ESI-).

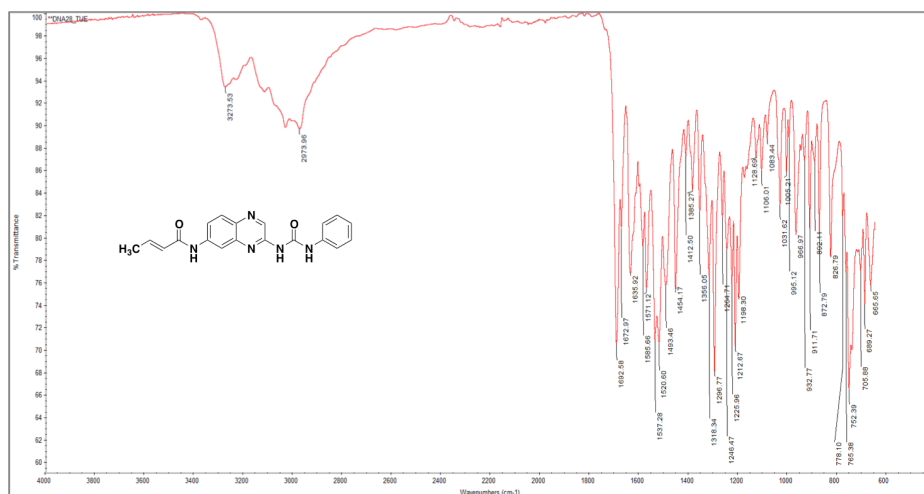

**Figure S74.** Infra red spectrum (ATR-FTIR) of compound (*E*)-*N*-(3-(3-phenylureido)quinoxalin-6-yl)but-2-enamide (**7i**) (bands in cm<sup>-1</sup>).

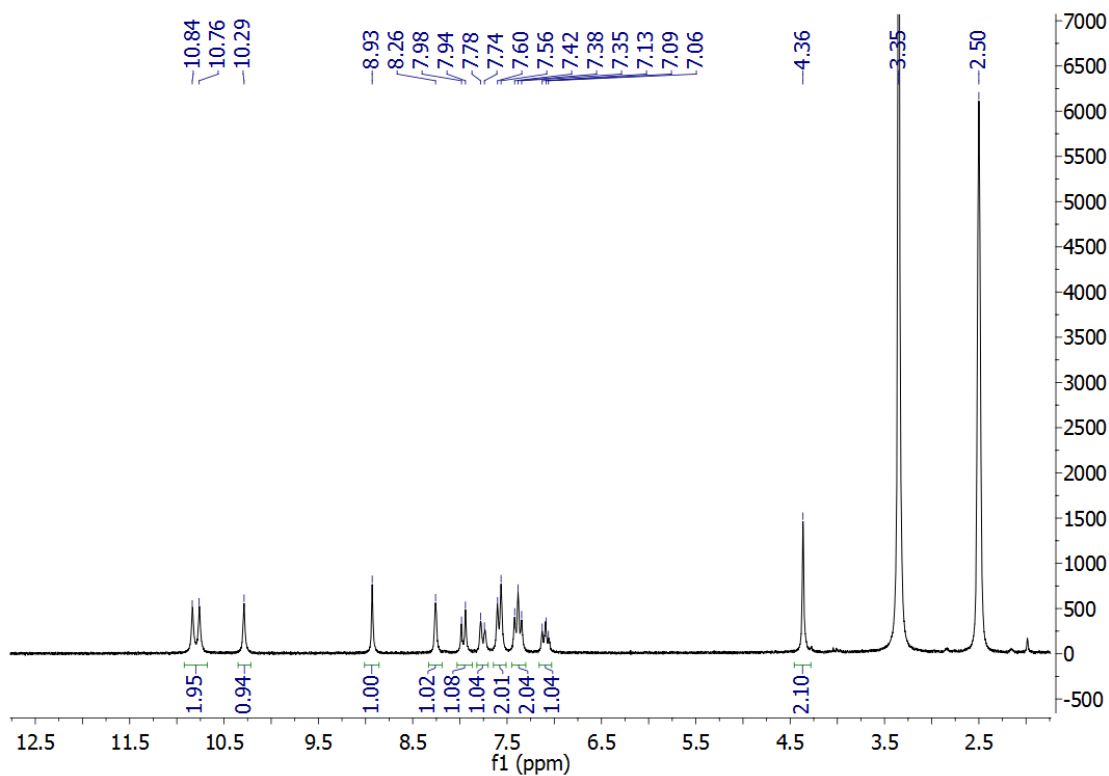

**Figure S75.** <sup>1</sup>H NMR spectrum of compound 2-chloro-*N*-(3-(3-phenylureido)quinoxalin-6-yl)acetamide (**7j**) DMSO-d<sub>6</sub>/200MHz/TMS)

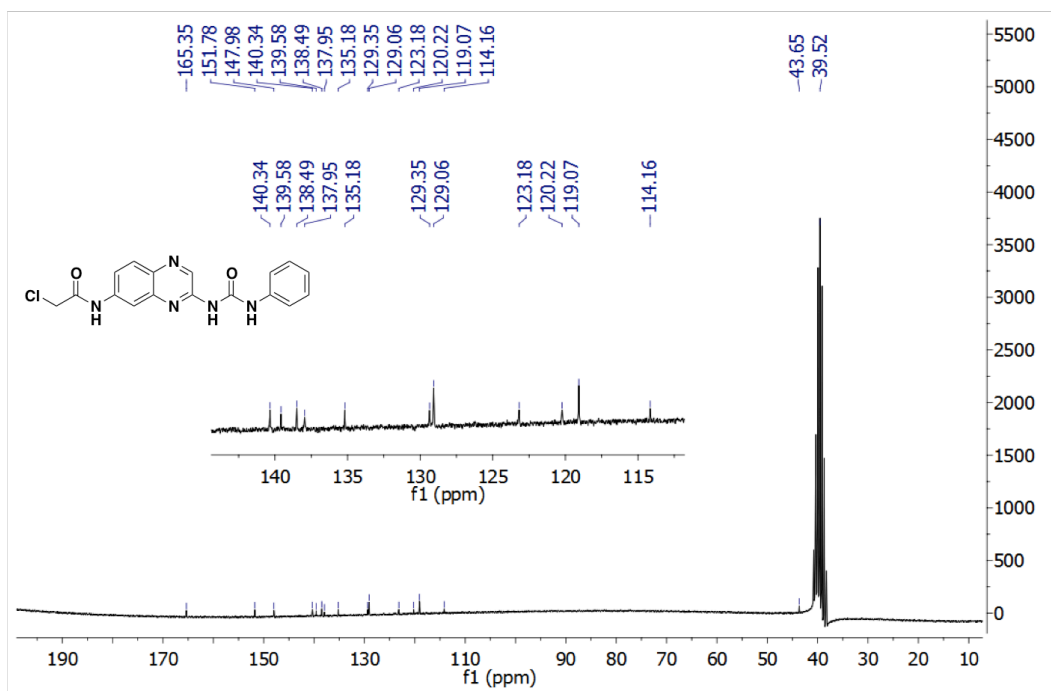

**Figure S76.** <sup>13</sup>C NMR spectrum of 2-chloro-*N*-(3-(3-phenylureido)quinoxalin-6-yl)acetamide (**7j**) (DMSO-d<sub>6</sub>/50MHz/TMS)

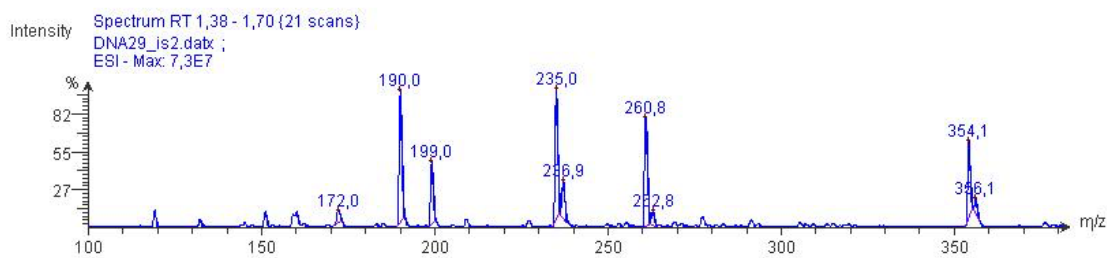

**Figure S77.** Mass spectrometry of compound 2-chloro-*N*-(3-(3-phenylureido)quinoxalin-6-yl)acetamide (**7j**) in negative mode (ESI).

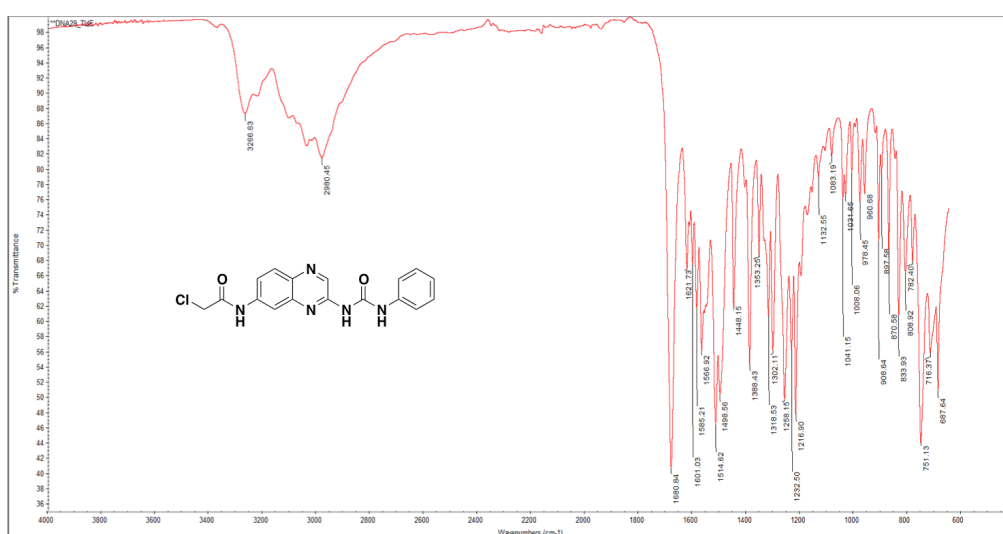

**Figure S78.** Infra red spectrum (ATR-FTIR) of compound 2-chloro-*N*-(3-(3-phenylureido)quinoxalin-6-yl)acetamide (**7j**) (bands in cm<sup>-1</sup>).

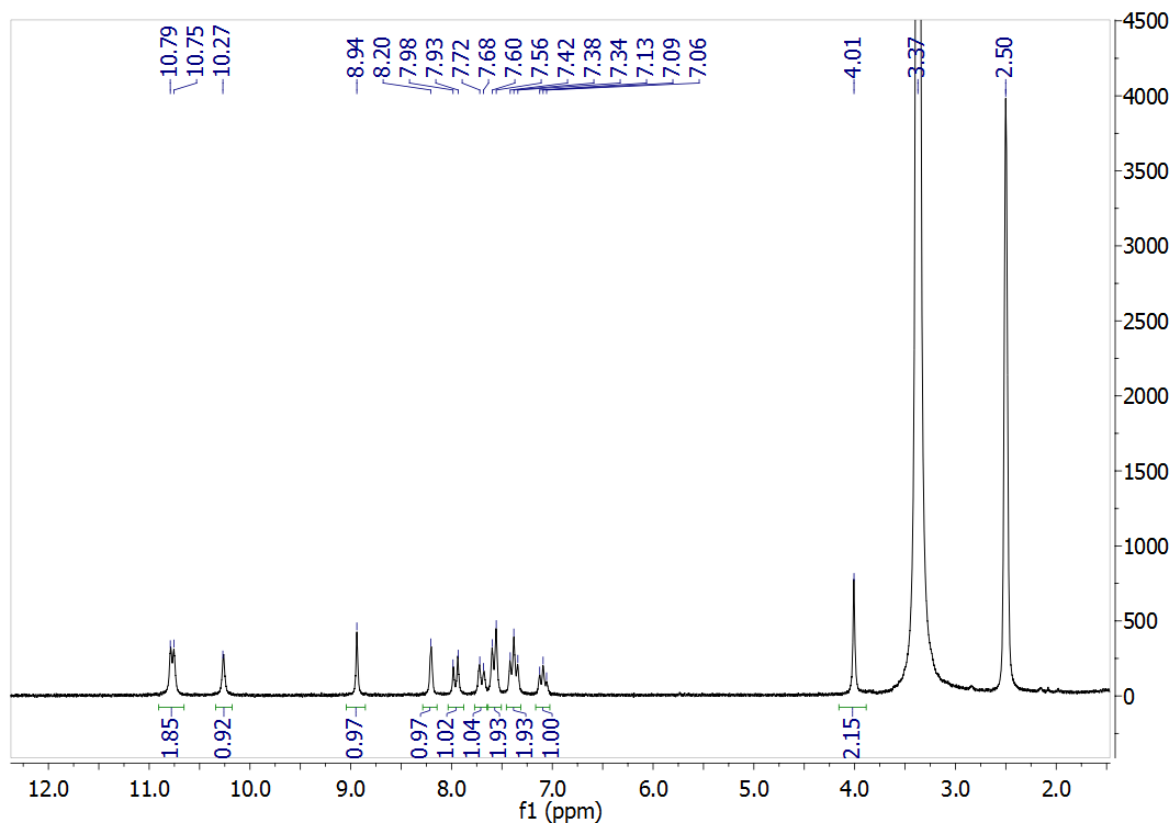

**Figure S79.**  $^1\text{H}$  NMR spectrum of compound 2-ciano-*N*-(3-(3-phenylureido)quinoxalin-6-yl)acetamide (**7k**) (DMSO- $d_6$ /200MHz/TMS)

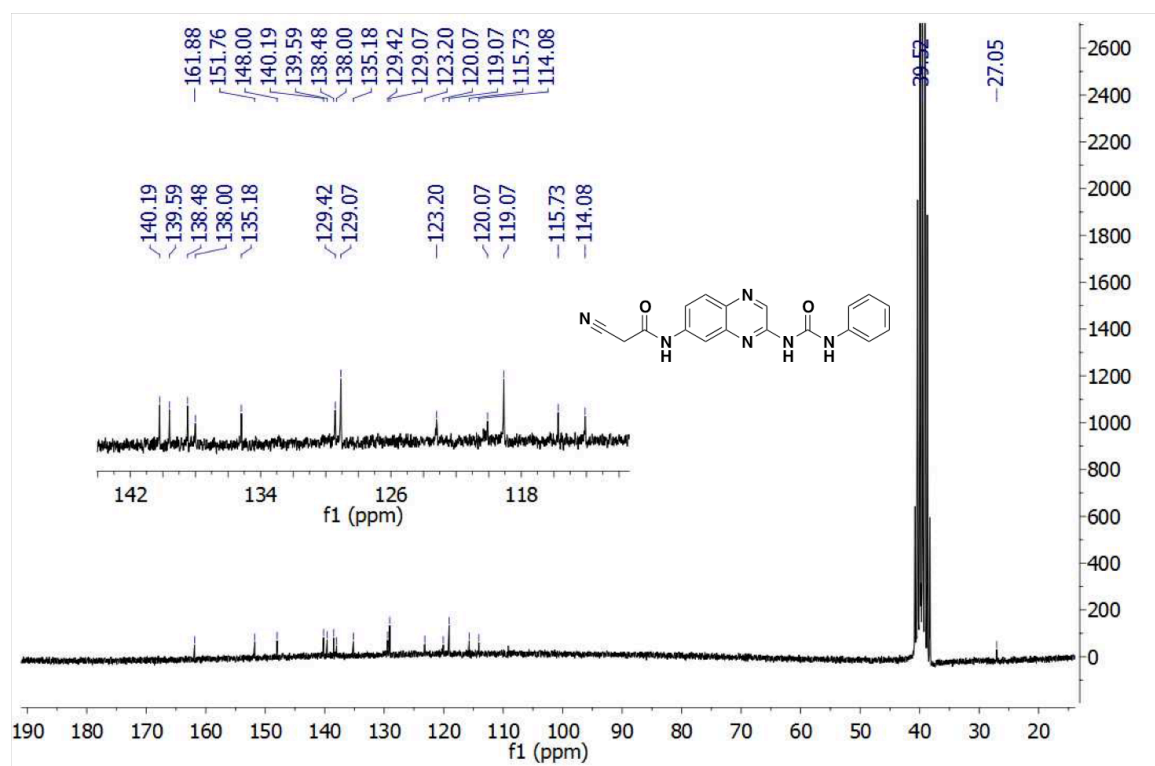

**Figure S80.**  $^{13}\text{C}$  NMR spectrum of compound 2-ciano-*N*-(3-(3-phenylureido)quinoxalin-6-yl)acetamide (**7k**) (DMSO- $d_6$ /50MHz/TMS)



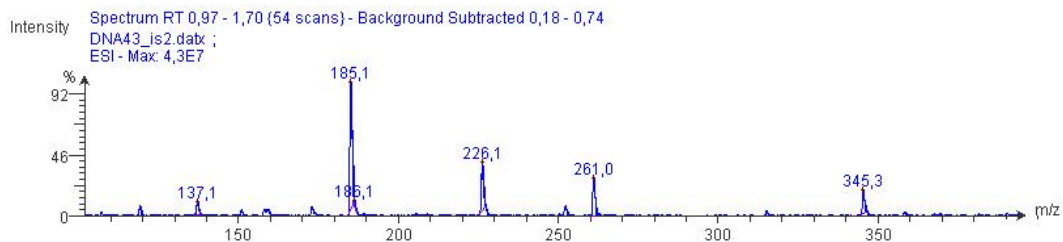

**Figure S81.** Mass spectrometry of compound 2-ciano-*N*-(3-(3-phenylureido)quinoxalin-6-yl) acetamide (**7k**) in negative mode (ESI-).

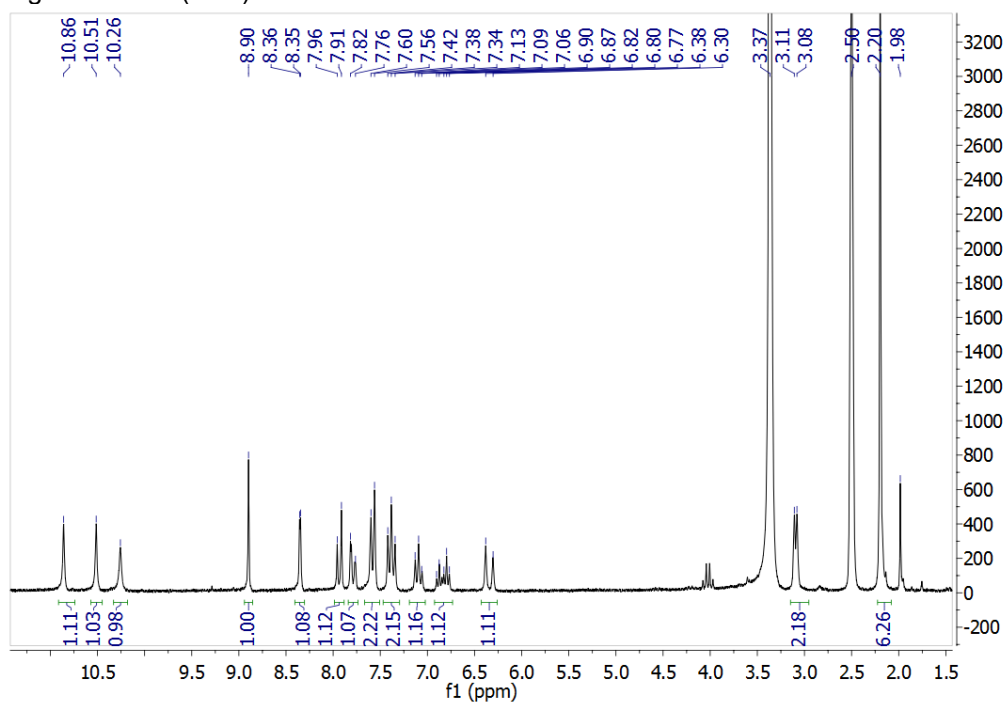

**Figure S82.**  $^1\text{H}$  NMR spectrum of compound (*E*)-4-(dimethylamino)-*N*-(3-(3-phenylureido) quinoxalin-6-yl)but-2-enamide (**7l**) (DMSO- $d_6$ /200MHz/TMS)

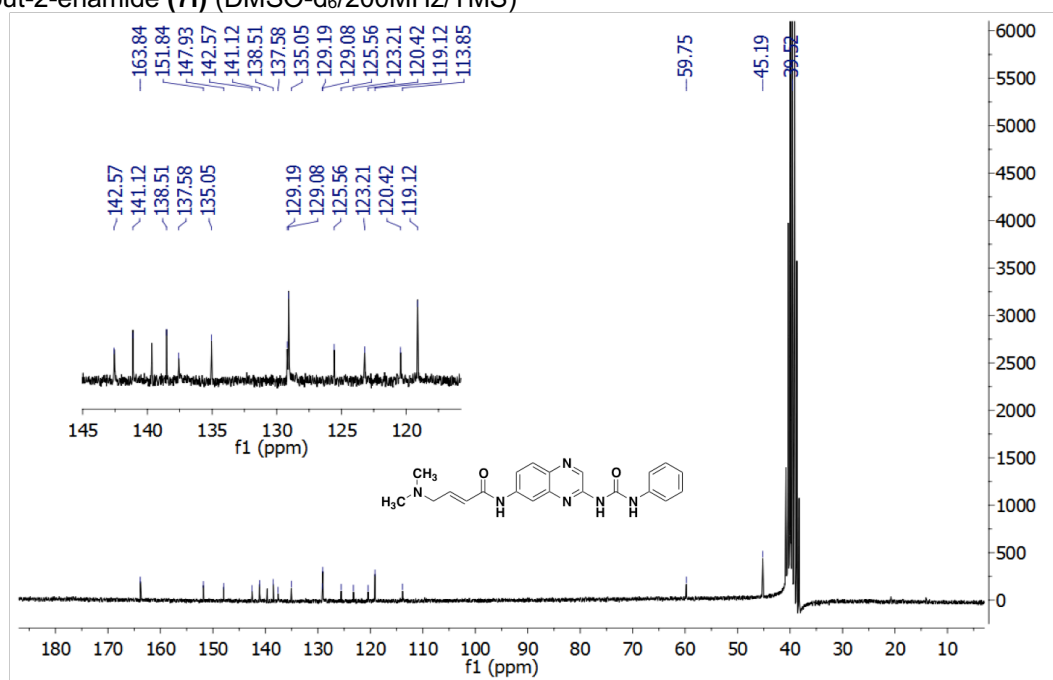

**Figure S83.**  $^{13}\text{C}$  NMR spectrum of compound (*E*)-4-(dimethylamino)-*N*-(3-(3-phenylureido) quinoxalin-6-yl)but-2-enamide (**7l**) (DMSO- $d_6$ /50MHz/TMS)

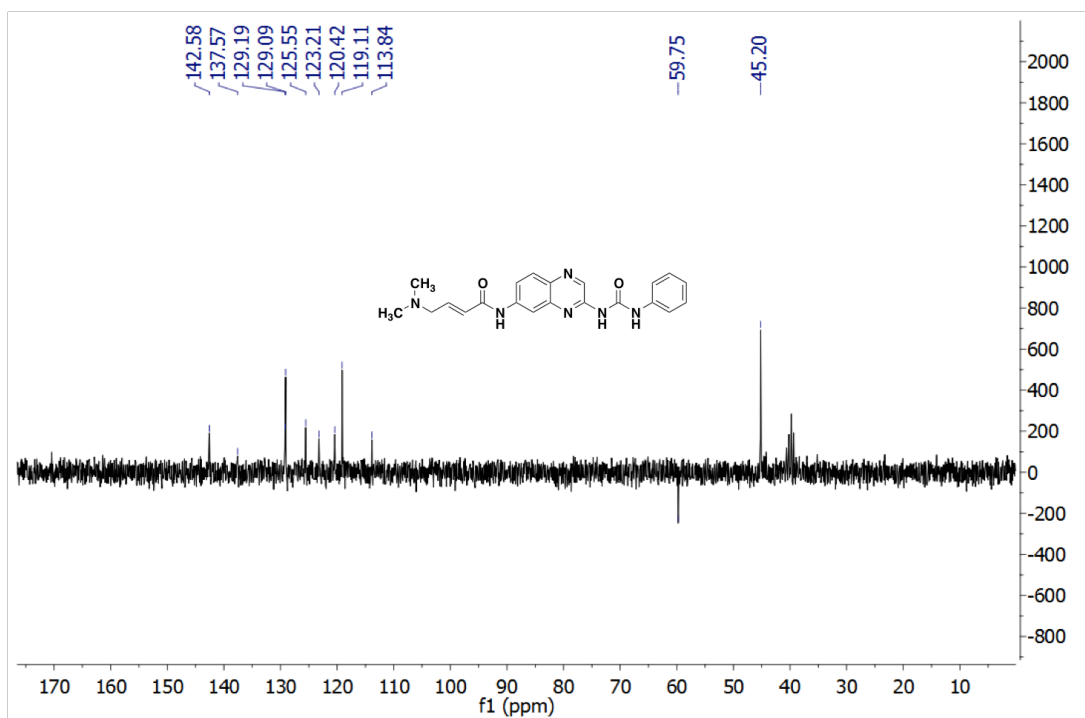

**Figure S84.** Espectro de DEPT 135 of compound *E*-4-(dimethylamino)-*N*-(3-(3-phenylureido)quinoxalin-6-yl)but-2-enamide (**7I**) (DMSO- $d_6$ /50MHz/TMS).

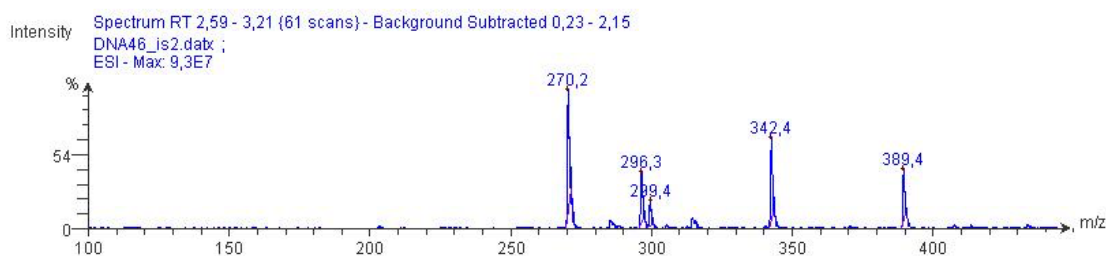

**Figure S85.** Mass spectrometry of compound *E*-4-(dimethylamino)-*N*-(3-(3-phenylureido) quinoxalin-6-yl)but-2-enamide (**7I**) in negative mode (ESI-).

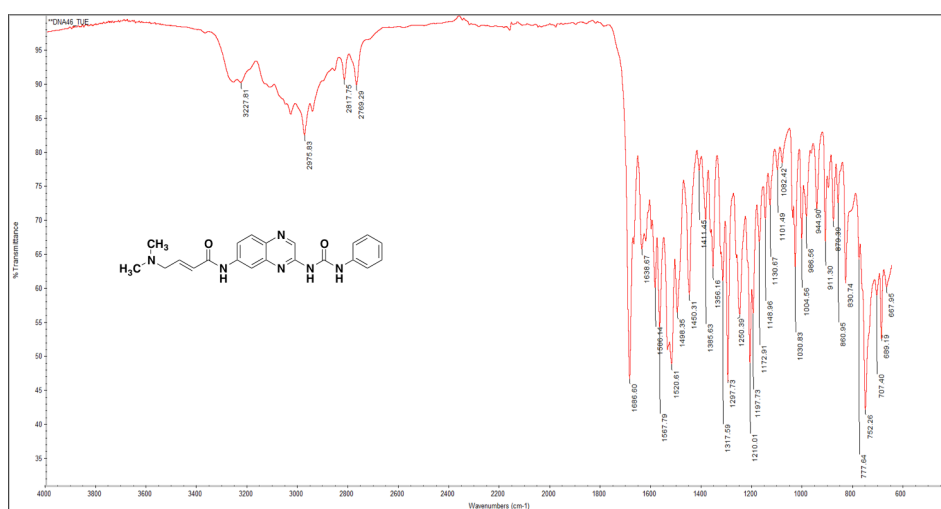

**Figure S86.** Infra red spectrum (ATR-FTIR) of compound *E*-4-(dimethylamino)-*N*-(3-(3-phenylureido) quinoxalin-6-yl)but-2-enamide (**7I**) (bands in cm<sup>-1</sup>).

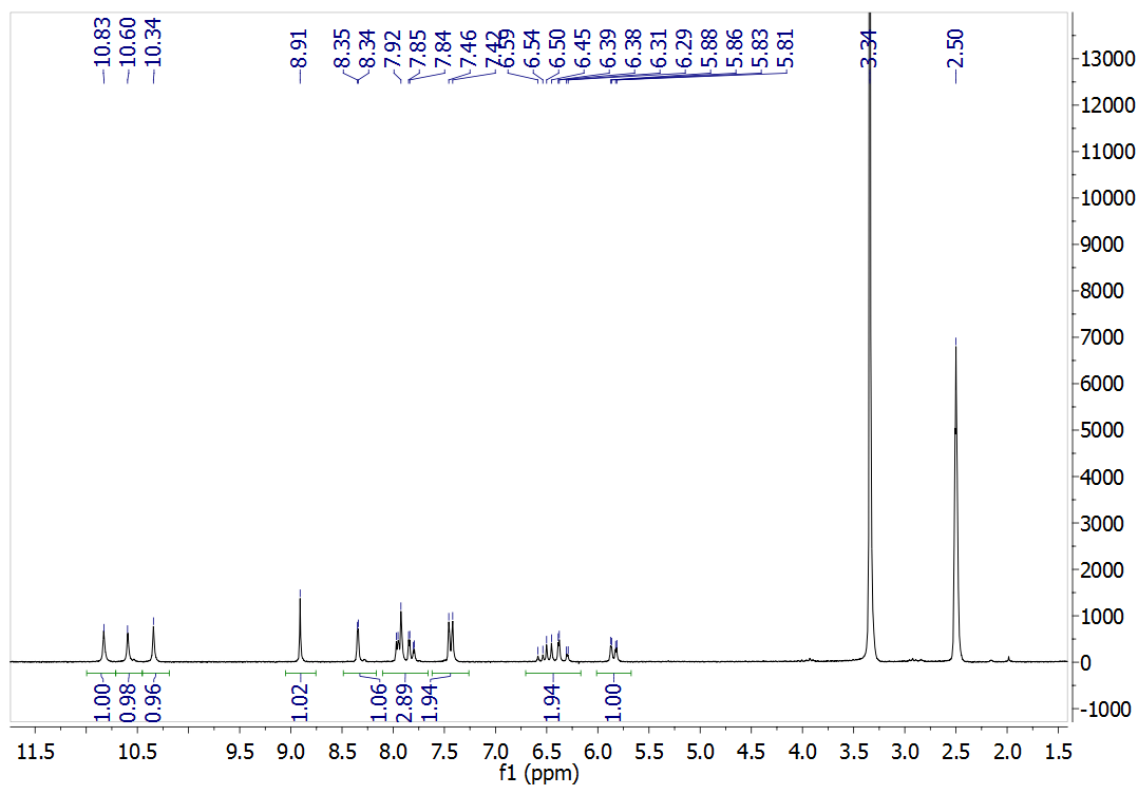

**Figure S87.**  $^1\text{H}$  NMR spectrum of compound *N*-(3-(3-(3-chloro-4-fluorophenyl) ureido)quinoxalin-6-yl) acrylamide (**7m**) (DMSO- $d_6$ /200MHz/TMS)

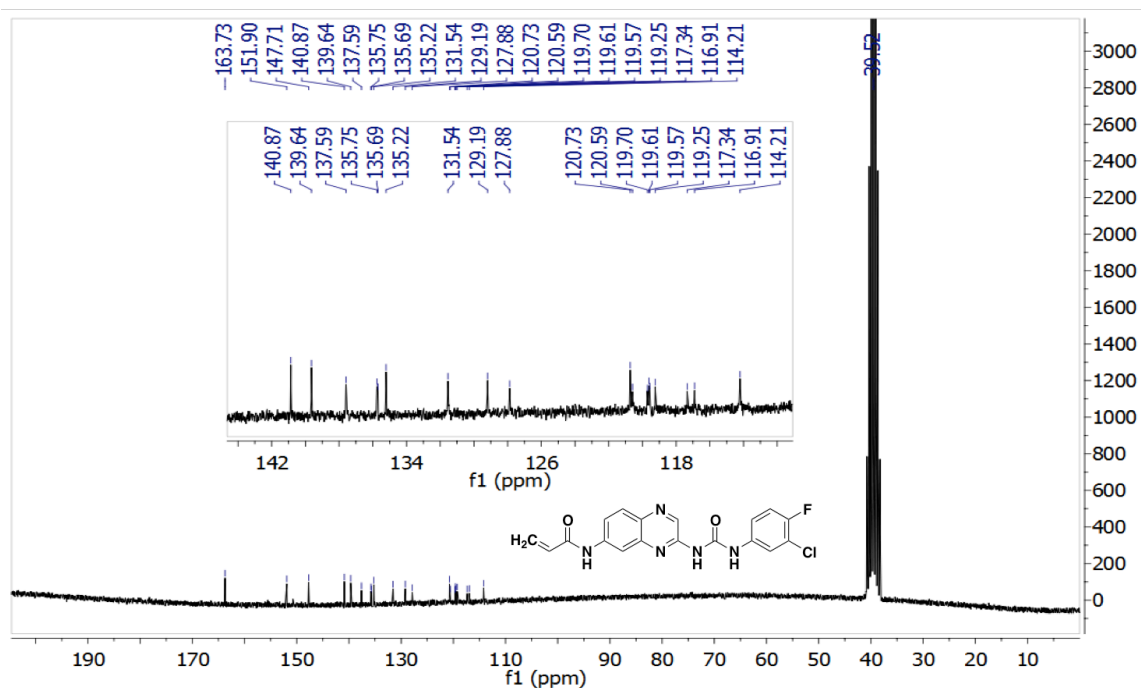

**Figure S88.**  $^{13}\text{C}$  NMR spectrum of compound *N*-(3-(3-(3-chloro-4-fluorophenyl)ureido) quinoxalin-6-yl) acrylamide (**7m**) (DMSO- $d_6$ /50MHz/TMS)

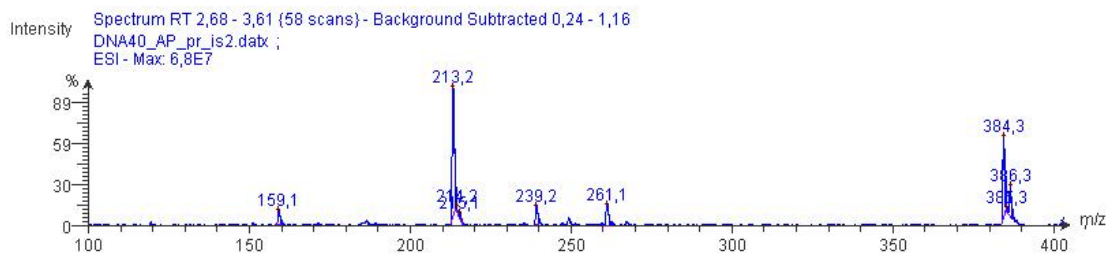

**Figure S89.** Mass spectrometry of compound *N*-(3-(3-(3-chloro-4-fluorophenyl)ureido) quinoxalin-6-yl) acrylamide (**7m**) in negative mode (ESI-).

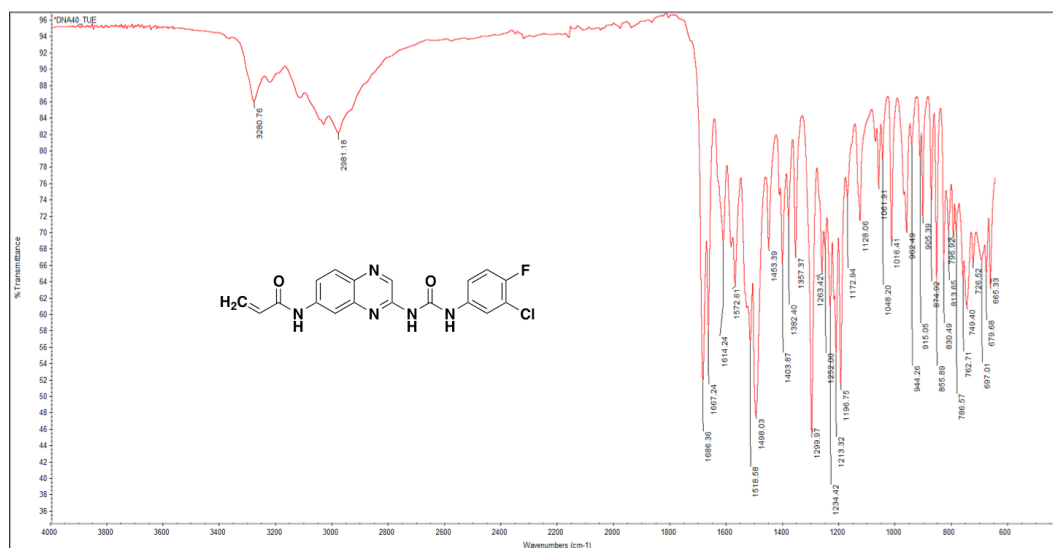

**Figure S90.** Infra red spectrum (ATR-FTIR) of compound *N*-(3-(3-(3-chloro-4-fluorophenyl)ureido)quinoxalin-6-yl) acrylamide (**7m**) (bands in  $\text{cm}^{-1}$ ).

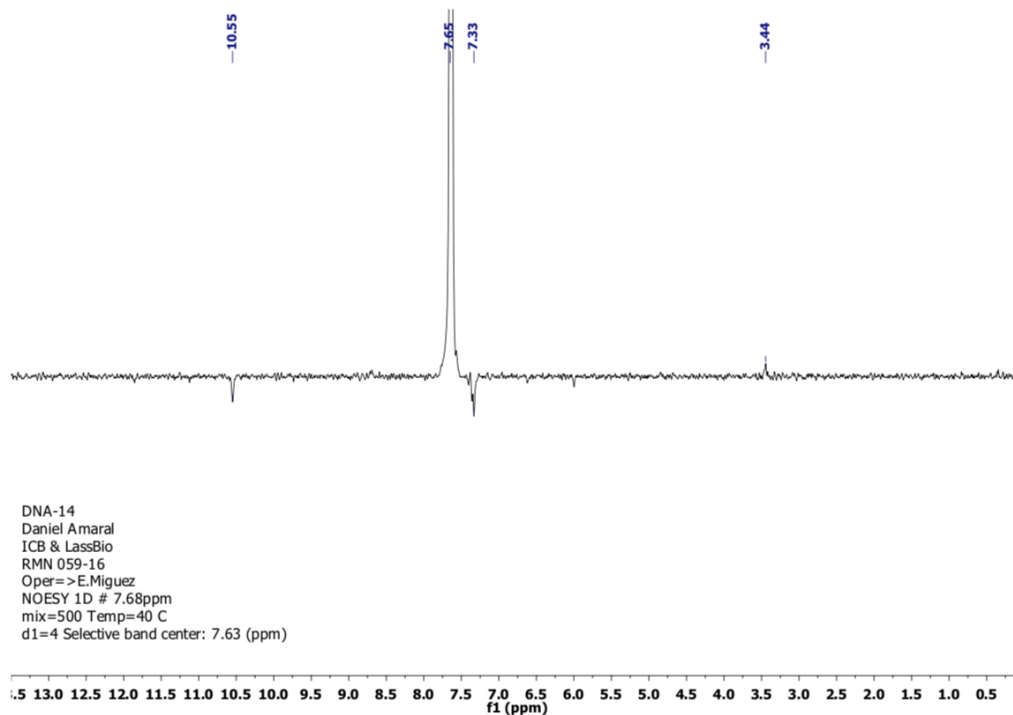

**Figure S91.** NOESY 1D spectrum of of compound 1-(7-nitroquinoxalin-2-yl)-3-phenylurea (**9c**) with irradiation at 7.68 ppm (DMSO- $d_6$ /300MHz/TMS)

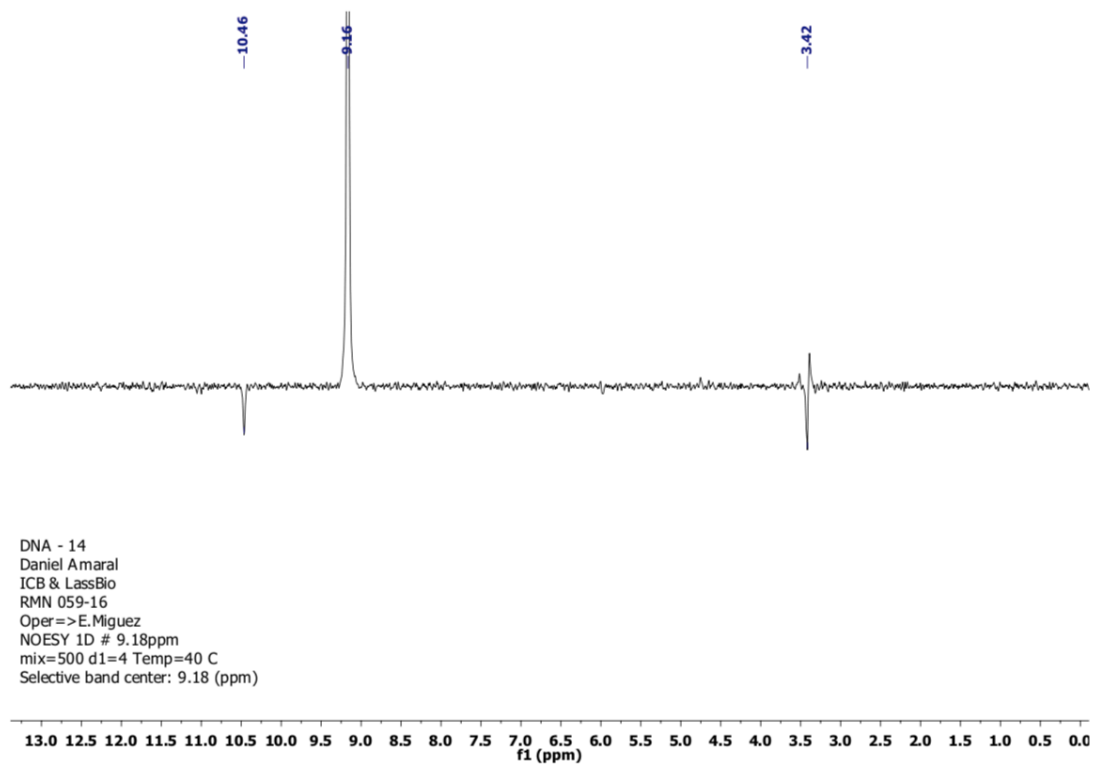

**Figure S92.** NOESY 1D spectrum of of compound 1-(7-nitroquinoxalin-2-yl)-3-phenylurea (**9c**) with irradiation at 9.18 ppm (DMSO-d<sub>6</sub>/300MHz/TMS)

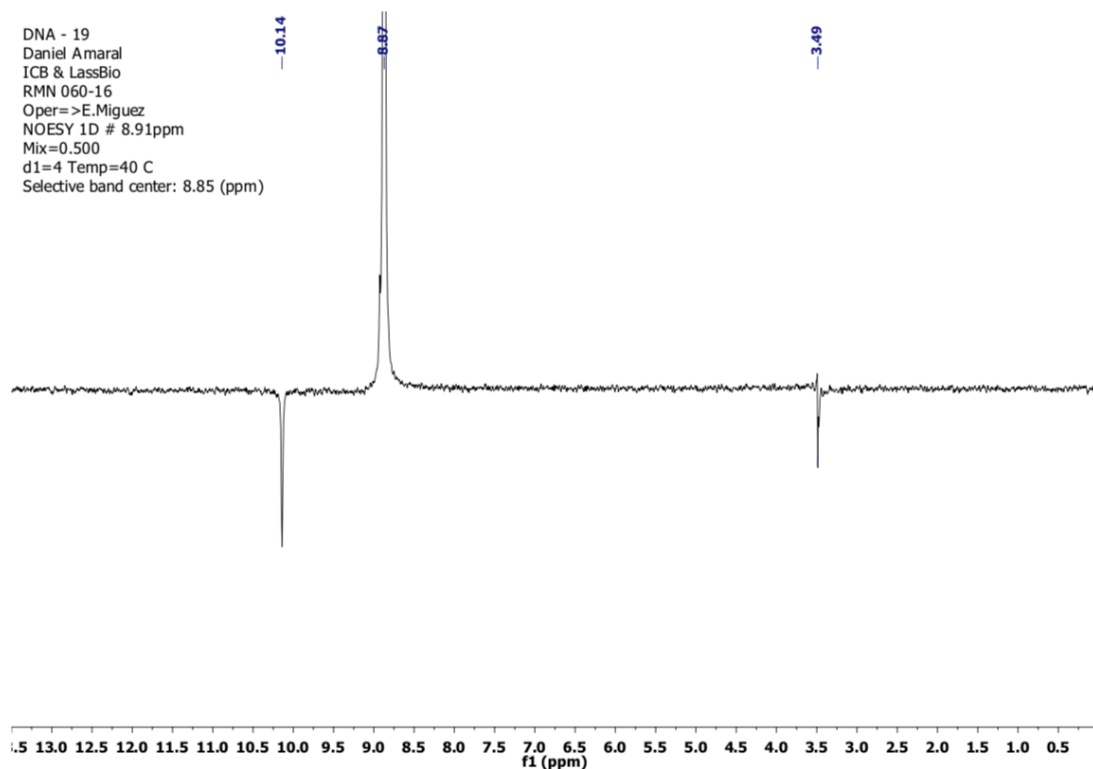

**Figure S93.** NOESY 1D spectrum of compound N-(3-(3-phenylureido)quinoxalin-6-yl) acrylamide (**7h**) with irradiation at 8.91 ppm (DMSO-d<sub>6</sub>/300MHz/TMS)

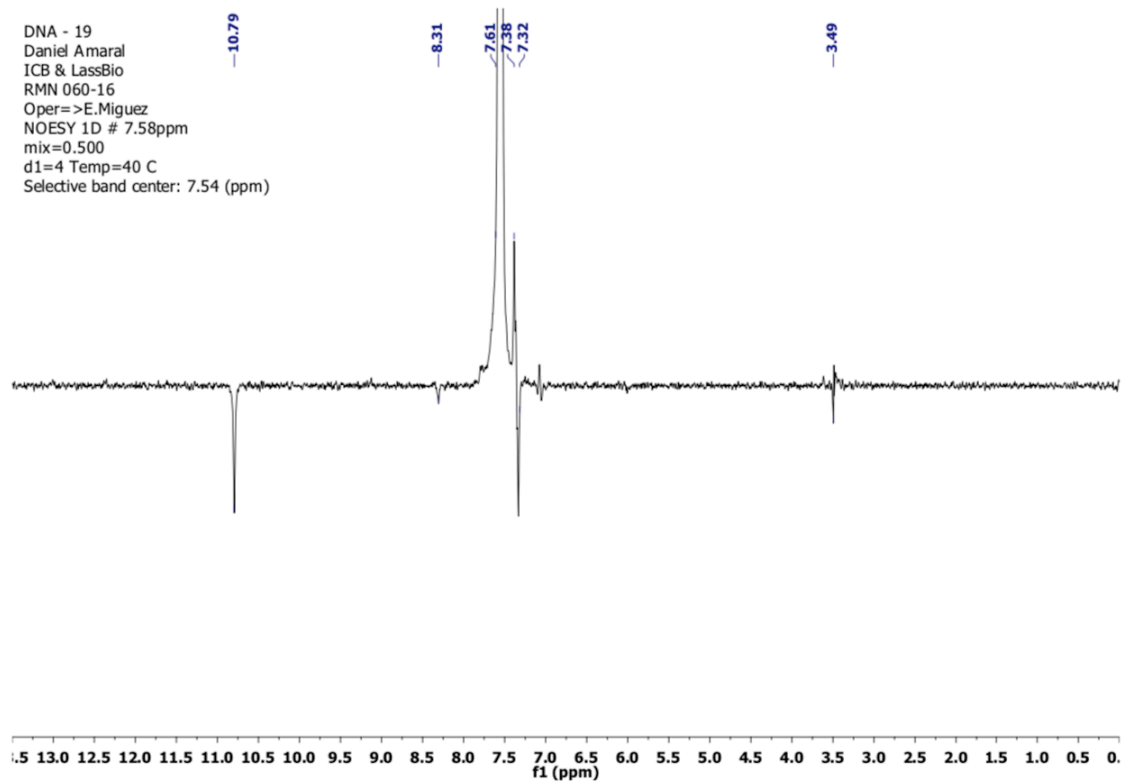

**Figure S94.** NOESY 1D spectrum of compound *N*-(3-(3-phenylureido)quinoxalin-6-yl) acrylamide (**7h**) with irradiation at 7.58 ppm (DMSO- $d_6$ /300MHz/TMS)
